# Interplay between high-drift and high-selection limits the genetic load in small selfing maize populations.

Arnaud Desbiez-Piat\*, Arnaud Le Rouzic<sup>†</sup>, Maud I. Tenaillon<sup>\*1</sup> and Christine Dillmann<sup>\*1</sup>

\*Université Paris-Saclay, INRAE, CNRS, AgroParisTech, GQE - Le Moulon, France, <sup>†</sup>Université Paris-Saclay, CNRS, IRD, UMR Évolution, Génomes, Comportement et Écologie, France.

**ABSTRACT** Population and quantitative genetics provide useful approximations to predict the evolution of populations and their multilocus adaptive dynamics. They are not supposed to hold under extreme parameter combinations, for which deviations need to be further quantified to provide insights into specific population dynamics. Here we focused on small selfing populations evolving under an under-explored High Drift-High Selection (HDHS) regime. We combined experimental data from the Saclay divergent selection experiments on maize flowering time, forward individual-based simulations, and theoretical predictions to dissect the evolutionary mechanisms at play in the observed selection response for a highly complex trait. We asked two main questions: How do mutations arise, spread, and reach fixation in populations evolving under HDHS? How does the interplay between drift and selection influence the response to selection? We showed that the long-lasting response to selection in populations whose estimated effective population size ranged between 2.5 to 4 is due to the rapid fixation of *de novo* mutations. Among all fixed mutations, we found a clear signal of enrichment for beneficial mutations revealing a limited cost of selection in these populations. We argue that environmental stochasticity and variation in selection coefficients contribute to exacerbate mutational effects, thereby facilitating selection grasp and fixation of small-effect mutations. Hence the HDHS regime with non-limiting mutation highlights an interesting interplay between drift and selection that sustains a continuous response to selection. We discuss our results in the context of breeding populations and long-term survival of small selfing populations.

**KEYWORDS** Truncation selection, Experimental evolution, Adaptive dynamics, Distribution of fitness effects, Selection cost, Effective population size, Environmental stochasticity

Understanding the evolutionary processes sustaining phenotypic shifts is at the core of quantitative genetic models. Empirical description of such shifts takes its roots in the breeding literature where truncation selection generates significant and sustainable responses (Hill and Caballero 1992; Walsh and Lynch 2018). Truncation selection is known to be the most effective form of directional selection (Crow and Kimura 1979). Under truncation selection, limits to the evolution of phenotypes are rarely reached as heritable variation persists through time (Odhiambo and Compton 1987; Moose *et al.* 2004; Weber and Diggins 1990; Caballero *et al.* 1991; Mackay 2010; Lillie *et al.* 2019). Such observations fit well with the Fisher's infinitesimal model (Fisher Ronald Aylmer 1930) and the derivatives of the breeder equation (Lush 1943; Lande 1979; Lande and Arnold 1983), which predict

a continuous and linear response with no finite limits. The rate of response is however expected to decline with selection-induced linkage disequilibrium (Bulmer 1971; Hospital and Chevalet 1996). Hence under finite population size, selection response is predicted to reach an asymptotic finite limit (Robertson 1960) as exemplified in mice (Roberts 1967; Falconer 1971). Results from other species are more equivocal (e.g. *Drosophila* (Weber 1990; Weber and Diggins 1990; Weber 1996), or maize (Odhiambo and Compton 1987; Moose *et al.* 2004; Dudley and Lambert 2010; De Leon and Coors 2002; Lamkey 1992). Incorporation of *de novo* mutations indeed predicts a slower rate of response instead of a hard limit (Hill 1982b,a; Weber and Diggins 1990; Wei *et al.* 1996; Walsh and Lynch 2018). These models point to a sub-optimal average selection response in two situations: when population size,  $N$  is below  $10^4$  and the genetic variance correspondingly small at mutation-drift equilibrium  $\widehat{V}_G$  (Hill 1982b; Houle 1989); and when  $\widehat{V}_G$  is reduced due to strong selection (Houle 1989). More

doi: 10.1534/genetics.XXX.XXXXXX

Manuscript compiled: Tuesday 22<sup>nd</sup> December, 2020

<sup>†</sup>Corresponding authors: Université Paris-Saclay, INRAE, CNRS, AgroParisTech, GQE - Le Moulon, 91190, Gif-sur-Yvette, France

generally, quantitative genetic models that include selection, drift and mutation (Houle 1989) are well-suited for predicting observed selection responses in a broad range of parameters (Hill and Rasbash 1986) — providing appropriate corrections (Walsh and Lynch 2018). Nevertheless, these models have been often developed under the general assumption of random mating, and a probability of fixation of new mutations determined by the product of population size by their selection coefficient,  $Ns$ , to be either  $\ll 1$  or  $\gg 1$ . Mathematical models for the intermediate regime  $Ns \approx 1$  and non-random mating still remains unsatisfactory. And the description of mechanisms of long-term selection response and whether it can be understood and predicted by existing equations has yet to be explored for polygenic traits under a High-Drift High-Selection regime and selfing.

Both the Distribution of mutational Fitness Effects (DFE) and the associated mutation rate are central to such predictions. Selection makes the DFE of fixed mutations different from that of incoming mutations (Kassen and Bataillon 2006). In large populations, a high proportion of incoming beneficial mutations are predicted to reach fixation, together with vanishing small effect deleterious mutations (Crow and Kimura 1971; Kimura 1983). In small populations and/or small selection intensity instead, frequent loss of beneficial mutations due to drift together with the fixation of moderately strong deleterious mutations is expected. Hence Kimura's equation that links the fixation probability ( $p$ ) of a mutation to the population size ( $N$ ) and selective coefficient ( $s$ ) —  $P_{fix}(s, p, N) = \frac{1 - e^{-4spN}}{1 - e^{-4sN}}$  — applies to a vast range of parameters including  $s$  values as high as 0.1 and  $N$  as small as 10 individuals Carr and Nassar (1970). An additional layer of complexity to DFE prediction comes from the mating system. Adaptation of very large asexual populations (such as microbes) is indeed affected by competition between alternative beneficial mutations occurring in different genetic background, a process referred to as clonal interference (Gerrish and Lenski 1998). Here the absence of recombination favors enrichment of the DFE in large mutational effect (Gerrish and Lenski 1998). However, if selection overpowers drift, *i.e.*  $Ns \gtrsim 1$ , or if the rate of beneficial mutation ( $\mu_B$ ) is small enough, the expected time lag between two successive mutations is sufficiently large for the first beneficial mutation to fix without interference of the second. While such behavior is expected when  $N\mu_B \gg 1/\ln(Ns)$ , for  $N\mu_B \gtrsim 1/\ln(Ns)$  beneficial mutations evolves under clonal interference (Desai and Fisher 2007). Altogether these results highlights how the interplay of key parameters -  $N$ ,  $s$ ,  $\mu$ , effective recombination — determine the DFE and in turn, the long-term selection response.

Genomic footprints of selection have considerably enriched our vision of allele adaptive trajectories sustaining selection responses. Observed genomic footprints include hard selective sweeps characterized by strong decrease in genomic diversity at the selected loci and its surrounding region through genetic hitchhiking (Hermisson and Pennings 2017); and soft sweeps associated with a weaker signature either because recombination on standing variation occurs so that a given advantageous mutation is associated with multiple haplotypes, or because recurrent *de novo* mutations are associated with multiple haplotypes. Classically, population genetic models describe adaptation as a succession of sweeps at loci encoding a trait. They have been challenged by quantitative genetics that rather posits a collective response at many loci translating into simultaneous subtle shifts in allele frequencies, the so-called polygenic selection model (Berg and Coop 2014; Wellenreuther and Hansson 2016;

Walsh and Lynch 2018). Whether adaptation proceeds through hard/soft sweeps or polygenic model primarily depends on the population-scaled mutation rate ( $\theta$ ) as well as the number of redundant loci that offer alternative ways for adaptation ( $L$ ) — the mutational target. Adaptation proceeds by sweeps for small  $\theta \times L$  ( $\leq 0.1$ ) while polygenic adaptation require large  $\theta \times L$  ( $\geq 100$ ) — in compliance with the infinitesimal model — with partial/soft sweeps in between (Höllinger *et al.* 2019; Messer and Petrov 2013). Extension of the hitchhiking model to a locus affecting a quantitative trait with an infinitesimal genetic background predicts that, under the hypothesis of a Gaussian fitness function, the fixation of a favorable mutation critically depends on the initial mutation frequency and the distance to the optimum (Chevin and Hospital 2008). Interestingly, while demographic parameters play a relatively small role in the speed of adaptation compared to standing and mutational variance, they change its qualitative outcome. Population bottlenecks diminish the number of segregating beneficial alleles, favoring hard sweeps from *de novo* mutations over soft sweeps from standing variation (Stetter *et al.* 2018).

Experimental evolution tracing short-term temporal dynamics of adaptation have complemented and validated models of adaptation, providing further hints into allele frequency changes, and into the extent of polymorphism and competition among beneficial mutations under various drift/selection/recombination regimes. Temporal dynamics may be obtained either through pedigree information or time series samples. This last approach has been employed successfully in microorganisms where complex patterns of mutation spreading have been observed during the course of adaptation. These include clonal interference, reduction of the benefit of a mutation in fit *versus* less fit genotypes (diminishing-return epistasis), and evidence for the same favorable mutation being selected in multiple independent evolved clones (genetic parallelism) (Good *et al.* 2017; Neher 2013; Good *et al.* 2012; Desai and Fisher 2007; Gerrish and Lenski 1998; Spor *et al.* 2014). However, in asexually reproducing microbes, adaptation proceeds through *de novo* mutations, which may reveal specific patterns not found in sexually-reproducing eukaryotes. In yeast, for instance, most adaptive changes correspond to the fixation of initial standing variation (Burke *et al.* 2014; Burke 2012). Patterns of allele frequency changes depend crucially on both  $N_e$  and the frequency of sex, that are themselves intimately linked (see Hartfield *et al.* (2017)). Considering a single locus, fixation time decreases correlatively with the level of self-fertilization (Haldane 1927). At the same time, multilocus simulations have shown that selfing reduces effective population size through background selection, and in turn beneficial mutations are less likely to fix (Kamran-Disfani and Agrawal 2014; Roze 2016). In addition, as selection interference reduces the efficiency of selection in low-recombining regions, high selfing rates also increase the fixation of deleterious mutations through genetic hitchhiking (Hartfield and Glémin 2014). These insights are together in line with the low selection approximation that posits that reduction in effective recombination decreases selection efficiency.

In the current paper, we aimed at investigating the dynamics of the response to selection of selfing populations evolving under High Drift-High Selection regime. Situated at the parameters boundaries of current models, this regime is of particular interest to understand the limits of adaptation and long-term survival of small selfing populations undergoing strong selection. We relied here on two Divergent Selection Experiment (DSEs) conducted

1 for 18 generations on Saclay plateau (Saclay DSEs). These Saclay  
2 DSEs are ideal settings to address those issues: selection-by-  
3 truncation has been applied in a higher organism (maize), on a  
4 highly polygenic and integrated trait (flowering time, (Buckler  
5 *et al.* 2009; Tenaillon *et al.* 2018)) that directly affects fitness. Previ-  
6 ous results indicate continuous phenotypic responses — values  
7 of mutational heritability ranged from 0.013 to 0.025 — sustained  
8 by a constant mutational input (Durand *et al.* 2010, 2012, 2015).  
9 We asked two main questions: How do mutations arise, spread,  
10 and reach fixation in populations evolving under HDHS? How  
11 does the interplay between drift and selection influence the re-  
12 sponse to selection? To answer those questions, we confronted  
13 the observed phenotypic response in Saclay DSEs to forward  
14 individual-based simulations that explicitly modeled the same  
15 selection (selection of 1% of the most extreme) and demographic  
16 scheme, and used theoretical predictions to measure deviations  
17 from expectations.

## 18 Materials and Methods

### 19 Plant material and historical field evaluation

20 We have conducted two independent divergent selection exper-  
21 iments (Saclay DSEs) for flowering time from two commercial  
22 maize inbred lines, F252 and MBS847 (thereafter MBS). These  
23 experiments were held in the field at Université Paris-Saclay  
24 (Gif-sur-Yvette, France). The selection procedure is detailed in  
25 Fig. S1 and Durand *et al.* (2010). Briefly, within each Saclay  
26 DSE, the ten earliest (resp. ten latest) flowering individuals were  
27 selfed at each generation to produce each 100 offspring used  
28 for the next generation of selection within the Early (resp. Late)  
29 populations. Within each population, we evaluated offspring  
30 of a given progenitor in four rows of 25 plants randomly dis-  
31 tributed in a four-block design, so that each block contained 10  
32 rows. We applied a truncation selection of 10/1000=1%. We con-  
33 ditioned selection on the maintenance of two families, *i.e.* two  
34 sub-pedigrees derived from two separate  $G_0$  ancestors. Thus,  
35 each family was composed of three to seven individuals at each  
36 generation with the additional condition that at least two differ-  
37 ent  $G_{n-1}$  progenitors were represented. Furthermore we applied  
38 a two-steps selection procedure, so that among the 100 offspring,  
39 we recorded the flowering time of 12 individuals per family, *i.e.*  
40 24 per population. To ensure the maintenance through time of  
41 minimal fitness, we selected among the 24 earliest (resp. latest)  
42 individuals, the 10 earliest (resp. latest) individuals with the  
43 highest kernel weight. Seeds from selected progenitors at all  
44 generations were stored in cold chambers.

45 We traced back the F252 and MBS pedigrees from generation  
46 20 ( $G_{20}$ ) to the start of the divergent selection experiments,  $G_0$ .  
47 The initial MBS pedigrees encompassed four families: ME1 and  
48 ME2 for the MBS Early (ME) population, and ML1 and ML2  
49 for the MBS Late (ML) population (Fig. S2). F252 Early (FE)  
50 population was composed of FE1 and FE2 families (Fig. S2). F252  
51 Late populations genealogies were more complex: FVL families  
52 (F252 Very Late in Durand *et al.* (2015)) ended at generation  
53 14 with the fixation of a strong effect allele at the *eIF-4A* gene  
54 (Durand *et al.* 2015). To maintain two families in F252 Late  
55 population, two families FL2.1 and FL2.2 were further derived  
56 from the initial FL2. These two families pedigrees are rooted in  
57 FL2 from a single  $G_3$  progenitor (Fig. S2).

### Phenotypic evaluation and observed selection response anal- ysis

The same approach as Durand *et al.* (2015) was applied. Briefly,  
progenitor flowering dates, measured here as the number of  
days to flowering after sowing equivalent to 20°C days of de-  
velopment (Parent *et al.* 2010), were recorded as the 12 earliest  
or latest plants in their progeny at each generation of the Saclay  
DSEs. We used these records to investigate the response to se-  
lection treating each family independently. After correction for  
block effects, and year effects according to equation (1) of Du-  
rand *et al.* (2015), the linear component  $b_{jk}$  of the within-family  
response to selection was estimated using the following linear  
model:

$$Y_{ijklm} = \mu_0 + b_{jk} \times \text{gener}_i + \varepsilon_{ijklm} \quad (1)$$

where  $\mu_0$  is the intercept corresponding to the average flower-  
ing time at generation  $G_0$ ,  $i$  stands for the year and correspond-  
ing generation of selection,  $j$  for the population,  $k$  for the family  
within population,  $l$  for progenitor within family, and  $m$  for the  
plant measurements within progenitor.

Family means and standard errors were computed at each  
generation to represent families selection responses presented  
Fig. 1 (a). All the values were centered around 100 for compari-  
son purposes with the simulated responses.

### Model framework

We used forward individual-based simulations that explicitly  
modeled the same selection — proportion of selected individu-  
als=1% — and demographic scheme — variations in population  
size — as Saclay DSEs. This regime is referred to High-Drift  
High Selection (HDHS). **Initial  $G_0$  simulation:** We obtained our  
initial population by mimicking a classical selection scheme used  
to produce fixed maize inbred lines in industry. To do so, we  
started from an heterozygous individual that was selfed for eight  
generations in a single-seed descent design. An additional gen-  
eration of selfing produced 60 offspring that were reproduced  
in panmixia for two generations to constitute the 60 individuals  
of the  $G_0$  initial population. Therefore, we started our simula-  
tions with a small initial residual heterozygosity ( $\leq 0.5\%$ ).  **$G_1$   
simulation:** Considering one Saclay DSE, we selected from the  
initial population (60 individuals), the two earliest and the two  
latest flowering parents on the basis of their average phenotypic  
value measured over 12 offspring. Each of these individuals  
constituted the ancestor of each of the four families. They were  
selfed to produce 100 offspring. **Subsequent generations  $n$ :**  
From there, we simulated the exact same selection scheme that  
included a two-steps procedure (Fig. S1). First, we selected the  
12 earliest (within each early family) and the 12 latest individuals  
(within each late family) from the 100 offspring of each parent.  
We next selected the five earliest (within each early family) and  
five latest (within each late family). In other words, at each step  
we retained 5 out of 500 individuals within each of the four  
families. Note that we imposed that the five selected individuals  
did not share the same parent.

### Simulated genetic and phenotypic values

Because maize flowering time is a highly polygenic trait (Buckler  
*et al.* 2009; Tenaillon *et al.* 2018), we imposed the haploid number  
of loci  $L = 1000$ . The genome of one individual was composed  
of 10 chromosomes. In each simulation: (i) we randomly as-  
signed each locus to a chromosome so that genome composition  
varied from one simulation to another; (ii) the position of each



1 locus within each chromosome was uniformly drawn between 0  
2 and 1.5, 1.5 Morgan being the total genetic length of each chro-  
3 some; (iii) the crossing-over positions along chromosomes  
4 were drawn in an exponential law of parameter 1, which corre-  
5 sponded to an effective crossing-over every Morgan. The initial  
6 population ( $G_0$ ) consisted of 60 individuals polymorphic for a  
7 small fraction of loci (residual heterozygosity). Let  $G_g^i$  be the  
8 genotype of the individual  $i$  of the generation  $g$ . Let  $a_l^{f(i,g)}$  the  
9 allelic effect at the locus  $l$  of the paternal chromosome  $f$  of the  
10 individual  $i$  at the generation  $g$  and  $a_l^{m(i,g)}$  the allelic effect at  
11 locus  $l$  of maternal chromosome  $m$  of individual  $i$  at generation  
12  $g$ . This allows us to model the genotype of an individual as :

$$G_g^i = [(a_1^{f(i,g)}, a_2^{f(i,g)}, \dots, a_l^{f(i,g)}, \dots, a_L^{f(i,g)}), (a_1^{m(i,g)}, a_2^{m(i,g)}, \dots, a_l^{m(i,g)}, \dots, a_L^{m(i,g)})] \quad (2)$$

13 The initial allelic effects were drawn in an reflected exponen-  
14 tial distribution, that is to say :

$$\forall l \wedge \forall (f(i,g) \vee m(i,g)), a_l \sim \text{Reflected exp}(\lambda) \quad (3)$$

15 Hence the probability density:

$$f(a_l, \lambda) = \frac{1}{2} \lambda e^{-|\lambda a_l|} \quad (4)$$

16 which implied that:

$$\mathbb{E}[a_l] = 0 \text{ and } \mathbb{V}[a_l] = \frac{2}{\lambda^2} \quad (5)$$

17 Starting from a hybrid heterozygote at all loci, we showed  
18 that after  $g$  generations of selfing and two generations of bulk,  
19 for  $L$  loci without linkage disequilibrium or mutation, we ex-  
20 pected:

$$\mathbb{E}(\sigma_{A_0}^2 = \sigma_{g+2}^2) = \mathbb{E}(\sigma_g^2) = \frac{1}{2^g} \times L \times \frac{2}{\lambda^2} \quad (6)$$

21 Therefore, to match the field estimation  $\widehat{\sigma_{A_0}^2}$ , one could let

$$\lambda = \sqrt{2L \frac{1}{2^g} \frac{1}{\widehat{\sigma_{A_0}^2}}} \quad (7)$$

22 However, drift, linkage disequilibrium and mutation can lead  
23 to deviations from the expected value of the initial genetic vari-  
24 ance. We therefore recalibrated all the allelic effects at generation  
25 0 to match the initial  $\widehat{\sigma_{A_0}^2}$  additive variance. To do so, we multi-

26 plied by a corrective factor  $k = \sqrt{\frac{\widehat{\sigma_{A_0}^2}}{\mathbb{V}(A_0)}}$ , where  $\mathbb{V}(A_0)$  was the  
27 additive variance of our population  $G_0$ , calculated in multiallelic  
28 as  $2 \times \sum_{i=1}^L p_i \alpha_i^2$  with  $p_i$  the frequency of the allele  $i$  and  $\alpha_i$  its  
29 effect. So at  $G_0$ ,  $\mathbb{V}(A_0) = \widehat{\sigma_{A_0}^2}$ .

30 Mutations occurred at each reproduction event. We drew the  
31 number of mutation per locus in a Poisson distribution of mean  
32  $L \times \mu$  where  $\mu$  was the mutation rate per locus. We drew the  
33 effect of a mutation at a locus in a reflected exponential distri-  
34 bution of parameter  $\lambda_{mut} = 2 \sqrt{\frac{L\mu}{\sigma_M^2}}$ . We computed phenotypic  
35 values as the sum of all allelic effects ( $100 \times 2$ ) plus an environ-  
36 mental effect randomly drawn in a normal distribution of mean  
37 0 and variance  $\sigma_E^2$ .

## Selection and drift regimes

38 As a control, we considered a neutral model without selection  
39 (the No Selection regime, NS) where the same selection scheme  
40 as in regime with selection was applied, but individual geno-  
41 typic values were drawn in a normal distribution of mean 100  
42 and variance  $\sigma_E^2$ , independently of the previous progenitors. In  
43 other words, we attributed as phenotypic values non-heritable  
44 environmental values. Genotypes were recorded for mutation-  
45 tracking purpose only.

46 In addition, we considered an alternative drift regime, where  
47 we increased the census population size by a factor 10, *ceteris*  
48 *paribus*, thereafter referred as the Low Drift regime (LD). Un-  
49 der this regime, we selected in each Saclay DSE the fifty ear-  
50 liest/latest individuals within early/late families out of five  
51 thousand individuals (instead of five hundred).  
52

53 We performed 2000 simulations for each of the four families  
54 in each of the four regimes.

## Parameter calibration

55 [Clark et al. \(2005\)](#) estimated the nucleotidic substitution rate to  
56 be in the range of  $30 \times 10^{-9}$ . We estimated roughly the mean  
57 mRNA length from maize reference genome V4 ([Jiao et al. 2017](#))  
58 to be equal to 6000 (median=5197, mean=7314). Hence we used  
59 a mutation rate per loci of:  $\mu = 6000 \times 30 \times 10^{-9} = 1.8 \times 10^{-4}$ .  
60 Other variance parameters were chosen such that the HDHS  
61 simulated cumulative response falls in the same range of values  
62 as the MBS observed one. To account for some flexibility in these  
63 variance parameters, we drew for each simulation the variance  
64 in an inverse-gamma distribution prior. More precisely,  
65

$$\sigma_E^2 \sim \Gamma^{-1}(17.6700, 37.5075) \implies \mathbb{E}(\sigma_E^2) = 2.25, \mathbb{V}(\sigma_E^2) = 0.32$$

$$\sigma_{A_0}^2 \sim \Gamma^{-1}(3.540, 5.715) \implies \mathbb{E}(\sigma_{A_0}^2) = 2.25, \mathbb{V}(\sigma_{A_0}^2) = 3.28$$

$$\sigma_M^2 \sim \Gamma^{-1}(17.67, 0.5626125) \implies \mathbb{E}(\sigma_M^2) = 3.38 \times 10^{-2} \\ \mathbb{V}(\sigma_M^2) = 7.27 \times 10^{-5}$$

## Expected response, effective population size and time to the most recent common ancestor

66 We computed the expected cumulative response after  $t$  genera-  
67 tions for haploid population as ([Hill 1982b](#); [Wei et al. 1996](#); [Weber and Diggins 1990](#); [Walsh and Lynch 2018](#)):  
68  
69  
70

$$R(t) \approx N_e \frac{i}{\sigma_p} \left[ t \sigma_m^2 + \left(1 - e^{-\frac{t}{N_e}}\right) \left(\sigma_A^2(0) - N_e \sigma_m^2\right) \right] \quad (8)$$

71 The effective population was the only parameter not explic-  
72 itly defined in our simulations and is of crucial importance in  
73 the response to selection. We estimated  $N_e$  following two ap-  
74 proaches. First using the Time to the Most Recent Common  
75 Ancestor (TMRCA) from the standard coalescence theory for a  
76 haploid sample of size  $k$  at generation  $g$  ([Walsh and Lynch 2018](#)):

$$\mathbb{E}(\text{TMRCA}_g) = 2N_{e(g)}^{\text{Coal}} \times \left(1 - \frac{1}{k}\right) \quad (9)$$

77 Second, from the variance in offspring number [Crow and](#)  
78 [Kimura \(1971\)](#); [Durand et al. \(2010\)](#), where  $N_e$  can be computed  
79 as  
80

$$N_{e(g)}^{\text{Var}(o)} = \frac{N - 1}{\text{Var}_{(g)}(\text{OffspringNumber})} \quad (10)$$



1 In the simulations,  $N_{e(g)}^{Coal}$  and  $N_{e(g)}^{Var(o)}$  were computed at gen-  
 2 eration  $G_{20}$ . We also computed the harmonic means between  
 3 generations  $G_2$  and  $G_{20}$  and computed the whole distribution (in  
 4  $2N_e$  generations) of the Kingman coalescent TMRCA as (Tavaré  
 5 1984):

$$f_{TMRCA}(t) = \sum_{i=2}^n \frac{(2i-1)(-1)^i(n(n-1)\dots(n-i+1))}{n(n+1)\dots(n+i-1)} \binom{i}{2} e^{-\binom{i}{2}t} \quad (11)$$

### 6 **Fitness function and Kimura's expected fixed mutational DFE**

7 Using diffusion equations, Kimura (Kimura 1962) predicts the  
 8 fixation probability of a mutation of selective value  $s$  and initial  
 9 frequency  $p$ :

$$P_{fix}(s(a), p, N_e) = \frac{1 - e^{-4s(a)pN_e}}{1 - e^{-4s(a)N_e}} \quad (12)$$

10 We considered a mutation occurring during meiosis in one  
 11 plant among the 500 of a family observed at a given generation.  
 12 When occurring, its effect on the phenotypic variance is negli-  
 13 gible. Therefore, initially this plant was selected independently  
 14 of the mutation. The 5 selected individuals comprised one het-  
 15 erozygote (Aa) bearing the mutation, and 4 homozygotes (aa).  
 16 Each selected individual produced 100 progenies, so that the fit-  
 17 ness effect of the mutation was evaluated at the next generation  
 18 in a population of 500 plants where the frequency of the mutant  
 19 allele was  $p = 1/10$  (Table 1).

**Table 1 Fitness model**

| Genotype                   | AA            | Aa           | aa           |
|----------------------------|---------------|--------------|--------------|
| Genotypic frequency        | 1/20          | 2/20         | 17/20        |
| Fitness value              | $w_{AA}$      | $w_{Aa}$     | $w_{aa}$     |
| Additive mutational effect | $a_{AA} = 2a$ | $a_{Aa} = a$ | $a_{aa} = 0$ |

20 In this population, the distribution of flowering time resulted  
 21 from a mixture of gaussian distributions.

$$f(x) = \sum_k \Pi_k f_k(x) \quad (13)$$

22 where  $f_k(x)$  is the flowering time distribution for plants with  
 23 genotype  $k \in AA, Aa, aa$ . As we selected 1% of the latest (resp.  
 24 earliest) flowering plants, all selected plants did flower after the  
 25 date  $z$ , computed as the 1% quantile of the mixture distribution.  
 26 The selection effect  $s(a)$  depended on the effect  $a$  of the muta-  
 27 tion on flowering time (Table 1). Indeed, the relative weight  
 28 of homozygous mutants  $AA$  among selected individuals was  
 29 computed as:

$$w_{AA} = \frac{1 - F_{AA}(z)}{\sum_k 1 - F_k(z)} \quad (14)$$

Which leads to:

$$s(a) = \frac{F_{aa}(z) - F_{AA}(z)}{1 - F_{aa}(z)} \quad (15)$$

30 The fixation probability  $P_{fix}(s(a), p, N_e)$  was computed as  
 31 in (Eq. 12) using  $s(a)$  (Eq. 15),  $p = 1/10$ , and  $N_{e(g)}^{Coal}$  for  $N_e$ .  
 32 The mutational effect  $a$  was drawn in a reflected exponential

distribution of parameter  $\lambda_{mut}$  and density function  $g_{\lambda_{mut}}(a)$ .  
 Hence, the density of fixed mutations  $h(a)$  was computed as:

$$h(a) = \frac{g_{\lambda_{mut}}(a)P_{fix}(s(a), p, N_e)}{\int g_{\lambda_{mut}}(x)P_{fix}(s(x), p, N_e)dx} \quad (16)$$

35 Moreover, we recorded the simulated  $a_{sim}$  of each fixed muta-  
 36 tion and computed the realized distribution, using kernel esti-  
 37 mation methods,  $h_{obs}(a)$ .

## Results

38 In order to examine the evolution and fate of small selfing popu-  
 39 lations submitted to strong selection, we investigated the dynam-  
 40 ics of the response to selection under a High Drift-High Selection  
 41 (HDHS) regime imposed on two divergent artificial selection  
 42 experiments for flowering time in maize (Saclay DSEs). We com-  
 43 pared experimental data to results of a simulation model specifi-  
 44 cally devised to mimic our experiments; and further computed  
 45 when possible expectations from population and quantitative  
 46 genetics theory.

47 **Empirical response after 20 generations of selection** In line with  
 48 previous observations for the first 16 generations, we observed  
 49 significant responses (Fig. 1 a, Tab. 2a, 2b) to selection after 20  
 50 generations in all families. Marked differences among families  
 51 nevertheless characterized these responses. This is well exem-  
 52 plified in the Late F252 families where one family (FVL) responded  
 53 very strongly with a mean shift of 11.32 Days to Flowering (DTF)  
 54 after 13 generations, corresponding to a linear regression co-  
 55 efficient of 0.86 DTF/generation (Tab. 2a). This family fixed a  
 56 deleterious allele at  $G_{13}$  and could not be maintained further  
 57 (Durand *et al.* 2012). We examined two derived families from  $G_{11}$ ,  
 58 the FL2.1 and FL2.2. These families were shifted by 3.19 DTF  
 59 and 2.60 DTF from the  $G_0$  FL2 mean value for FL2.1 and FL2.2,  
 60 respectively. These corresponded to a linear regression coeffi-  
 61 cient of 0.11 DTF/generation for FL2.1 and 0.12 DTF/generation  
 62 for FL2.2 (Tab. 2a). The selection response were more consistent  
 63 for the two Early F252 families, with a shift after 20 generations  
 64 of -4.27 DTF for FE1, and a shift of -5.34 DTF for FE2 (Tab. 2a).  
 65 Considering MBS genetic background, the late (resp. early) MBS  
 66 families were shifted by 8.64 DTF for ML1, and 11.05 DTF for  
 67 ML2 (resp. -9.34 DTF for ME1 and -11.72 DTF for ME2), with  
 68 linear regression coefficient of 0.24 DTF/generation for ML1,  
 69 and 0.46 DTF/generation for ML2 (resp. -0.41 DTF/generation  
 70 for ME1 and -0.42 DTF/generation for ME2) DTF (Tab. 2b).  
 71

72 **Simulation model validation** We used simulations both to vali-  
 73 date our model and to explore two drift intensities, High and  
 74 Low. We used corresponding negative controls with No Selec-  
 75 tion (NS) which lead to four regimes: High Drift-High Selection  
 76 (HDHS, the default regime), High Drift-No Selection (HDNS),  
 77 Low Drift-High Selection (LDHS) and Low Drift-No Selection  
 78 (LDNS). In order to validate the parametrization of our model,  
 79 we compared the observed MBS response in all families to the  
 80 simulated selection responses. Because of the symmetry in the  
 81 model construction and for simplicity, simulated results are de-  
 82 scribed for late populations only. Considering the HDHS regime,  
 83 we recovered a simulated response with a mean genetic gain of  
 84 0.49 DTF/generation (Fig. 1, Tab. 2c). Starting from a mean gen-  
 85 otypic value of 100 DTF, the mean genotypic value was shifted by  
 86 13.0 DTF (SD: 5.2) after 20 generations. Our simulated response  
 87 therefore closely matched the observed response indicating an  
 88 accurate parametrization of our simulation model (Fig. 1. We

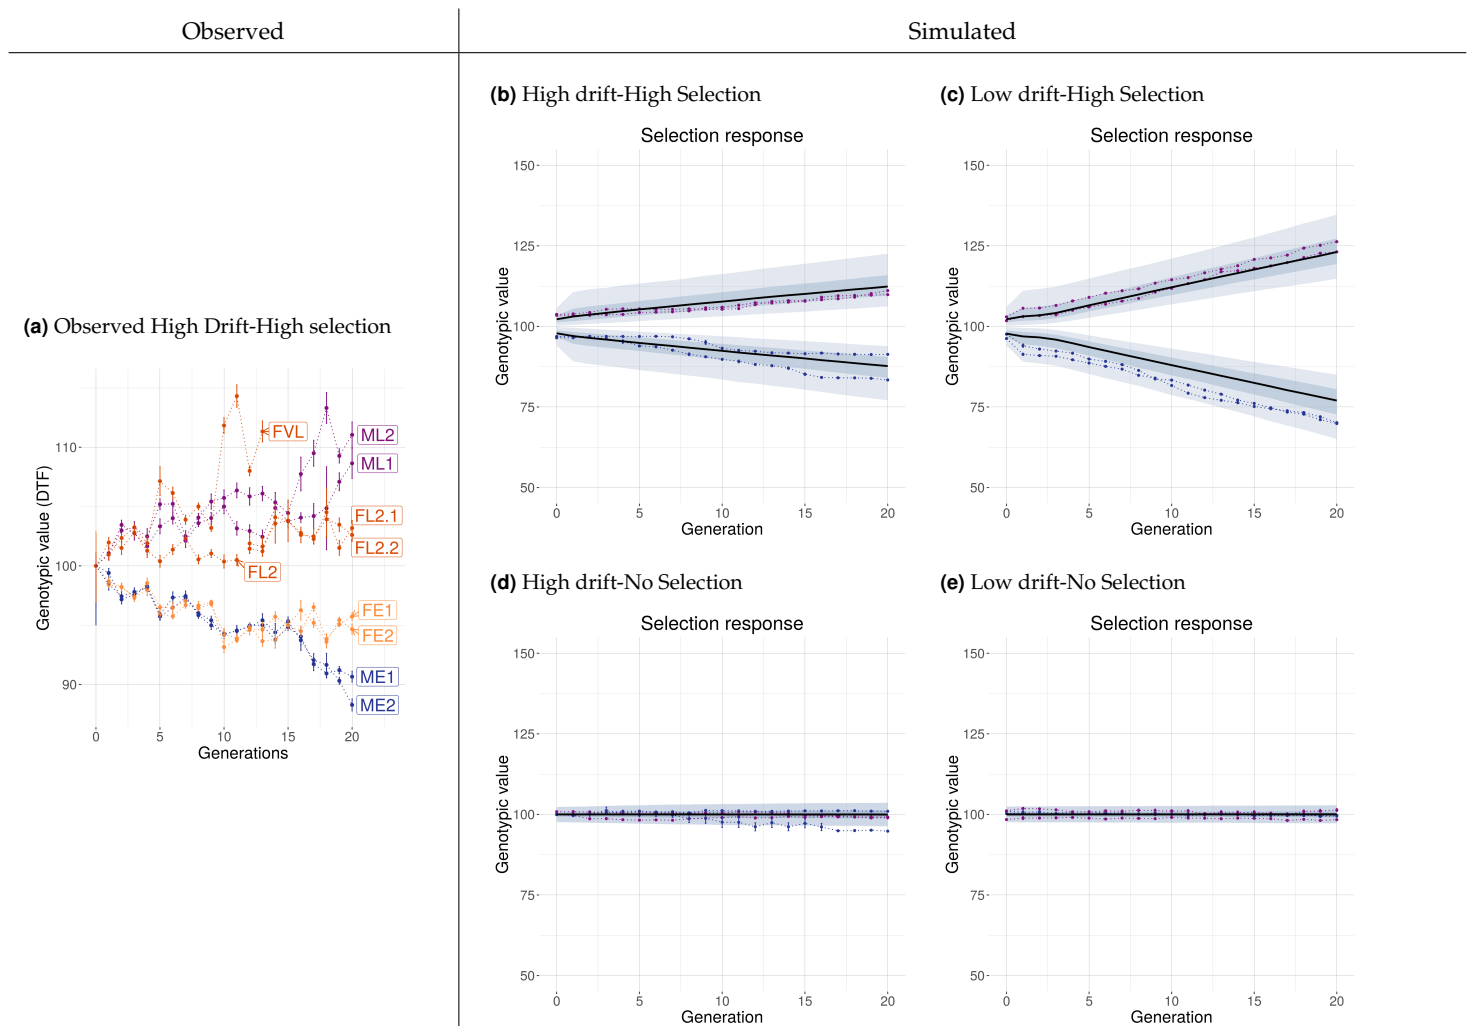

**Figure 1 Observed and simulated selection response.** Selection response is visualized by the evolution of the mean genotypic values of the selected progenitors per family (expressed in Days To Flowering, DTF) across generations based on observed (a) and simulated (b-e) data. In (a), red (resp. orange) corresponds to late (resp. early) flowering F252 families, while violet (resp. blue) corresponds to late (resp. early) flowering MBS families. All families were centered around 100, and Vertical bars correspond to  $\pm 1$  genotypic standard error around the mean. We simulated four regimes with the parameters calibrated from the MBS observed response: High Drift-High Selection (b), Low Drift-High Selection (c), High Drift-No Selection (d), Low Drift-No Selection (e). Violet (resp. blue) color identifies late (resp. early) population. In each population, the black line represents the evolution of the median value over 2000 simulations of the family genotypic mean. The shaded area corresponds to the 5<sup>th</sup>-95<sup>th</sup> percentiles (light blue) and to the 25<sup>th</sup>-75<sup>th</sup> percentiles (dark blue). In addition, two randomly chosen simulations are shown with dotted lines

1 formally tested the significance of our simulated response by  
 2 comparing the linear response under HDHS to that obtained  
 3 under HDNS. We were able to reject the null hypothesis of no  
 4 selection response in 96.4% of the simulations under HDHS  
 5 (P-value<0.05).

6 To investigate the impact of a ten-fold increase of the  
 7 census population size on selection response, we contrasted  
 8 HDHS to LDHS. Just like for HDHS, we obtained a signif-  
 9 icant response under LDHS with a mean genetic gain of  
 10 1.10 DTF/generation (Fig. 1, Tab. 2c). This gain was greater  
 11 than the +0.035 DTF/generation (SD: 0.035) obtained for the  
 12 LDNS control model, and we were able to reject the null hypoth-  
 13 esis of no selection response in 100% of the simulations. The  
 14 gain under LDHS corresponded to a shift of +24 DTF (SD: 6.2),  
 15 which was substantially higher than that observed under HDHS.  
 16 Hence multiplying the census population size of HDHS by 10

(LDHS) resulted in roughly doubling the selection response. 17

In sum, we validated the accuracy of our model by showing  
 18 that the simulated response closely matched the observed re-  
 19 sponse. We further demonstrated that selection triggered the  
 20 response in all populations under both low and High Drift. Fi-  
 21 nally, we confirmed our expectation that the selection response  
 22 was higher in a Low Drift than in a High Drift regime. 23

#### Effective population size: 24

We estimated coalescent effective population sizes  $N_e$  from  
 25 the standard coalescence theory (Eq: (9)) using a Wright-Fisher  
 26 population of size 5 (HD) and 50 (LD) individuals. With 5 in-  
 27 dividuals, we expected a theoretical coalescence time around  
 28 8 generations, and with 50 individuals, around 98 generations  
 29 (i.e. more than the number of simulated generations). Focusing  
 30 on the last generation, our simulations provided estimates of  
 31 mean  $G_{20}$  TMRCAs of 7.6 generations under neutrality (NS) for  
 32

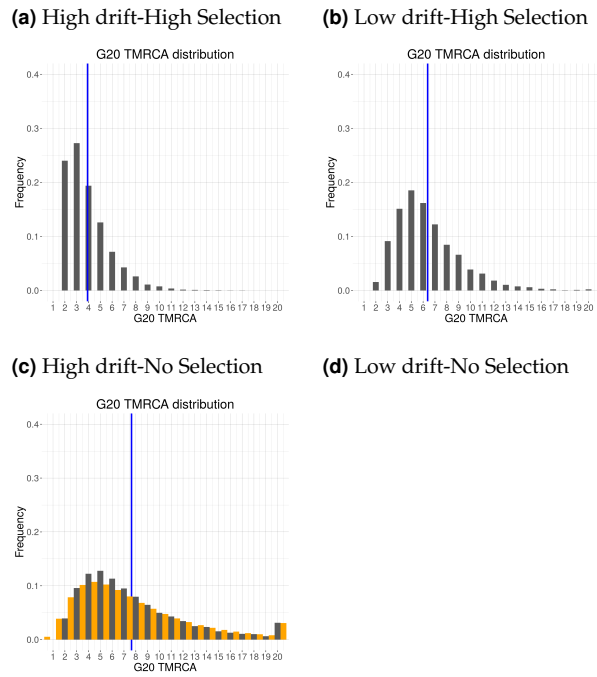

**Figure 2** Frequency distribution of the Time to the Most Common Ancestor of progenitors constituting the last simulated generation.  $G_{20}$  TMRCAs distribution (in grey) was obtained under HDHS (a), LDHS (b), HDNS (c) with mean TMRCAs indicated as a blue vertical line. In (c), we plotted in gold the theoretical expectation of TMRCAs distribution following Eq: (11). Note that under LDNS, theoretical expectations for TMRCAs reached 98 generations, while our simulations were run for 20 generations. We therefore discarded the corresponding graph.

1 HD, closely matching the theoretical expectation of 8 (Tab. 2c).  
 2 Considering the LDNS simulations, theoretical expectations (98)  
 3 largely exceeded the number of generations (20). In contrary,  
 4 we found mean  $G_{20}$  TMRCAs of 3.9 under HDHS, and 6.4 under  
 5 LDHS. Fig. 2 shows the distribution of the TMRCAs estimated  
 6 at  $G_{20}$  in the three regimes. Indeed, under HDNS, the distri-  
 7 bution fits the expectation from Eq: (11). As compared to the  
 8 neutral case, Fig. 2 also shows that both the high drift (HDHS)  
 9 and low drift (LDHS) selection cases lead to reduced TMRCAs,  
 10 as expected.

11 We next assessed the impact of selection on  $N_e$  and compared  
 12 different estimates, either based on TMRCAs (Eq: (9)), or on the  
 13 variance in offspring number (Eq: (10)), or on the cumulated  
 14 response to selection (Eq: (8)). Values obtained are summarized  
 15 in Tab. 2c. We found that in the absence of selection,  $N_e$  esti-  
 16 mated from the mean TMRCAs were close to the actual number  
 17 of reproducing individuals (4.8 for HDNS and  $>10$  for LDNS),  
 18 while they were much smaller under both selection regimes (2.5  
 19 for HDHS and 3.3 for LDHS). The observed differences between  
 20  $N_{e(20)}^{\text{Coal}}$  and the harmonic mean of  $N_{e(g)}^{\text{Coal}}$  revealed a strong influ-  
 21 ence from a pedigree perspective, of the first generation on the  
 22 adaptive dynamics. When  $N_e$  was estimated from the variance  
 23 in offspring number, estimations without selection (4.1 under  
 24 HDNS and 42 under LDNS) were close to the actual number of  
 25 reproducing individuals, even for LDNS. Finally,  $N_e$  estimations  
 26 from the cumulated response to selection fell within the same

range as the ones from the variance in offspring number in both  
 selection regimes. In summary, most  $N_e$  estimates were close to  
 the actual number of reproducing individuals in the absence of  
 selection. High selection strongly reduced  $N_e$  estimations, but  
 merely in the low drift (LDHS) case. Indeed,  $N_e$  reduction due  
 to selection is around 67%, depending on the estimations in the  
 LDHS regime, while it is only around 50% in the HDHS regime.

**Stochasticity in the response to selection:** We addressed the qual-  
 itative nature of selection response focusing on its linearity. To  
 do so, we measured in each family the average genetic gain per  
 generation over 2000 simulations by fitting a linear regression  
 model. The average genetic gain was 0.49 DTF/generation under  
 HDHS, and 1.1 DTF/generation under LDHS (Tab. 2c). Associo-  
 ated  $R^2 > 0.95$  indicated an accurate fit of the data to the linear  
 model. Yet, large standard deviations around these estimates  
 (0.2 and 0.27 for HDHS and LDHS, respectively) pointed either  
 to high stochasticity or a non-linear response. Single simulations  
 indicated non-linear response Fig. S3. Noteworthy, a strong re-  
 sponse was observed between  $G_0$  and  $G_1$  ( $G_0G_{20}$  Fig. S3) with  
 similar values in HDHS and LDHS, around 1.6 DTF/generation  
 (Tab. 2c). Subsequently, simulations displayed discontinuities  
 with abrupt changes of slopes at some generations, a signal com-  
 patible with the fixation of new mutations (Fig. S3). In order to  
 characterize such discontinuities, we fitted a linear segmentation  
 regression on individual simulations from  $G_1$  and onwards. We  
 estimated the number of breakpoints (i.e. slope changes), the  
 corresponding slopes, and the first and greatest slope based on  
 AIC minimization (Durand et al. 2010). The first slope described  
 an average gain of 0.59 DTF/generation in the HDHS regime,  
 and almost twice (0.96 DTF/generation) in the LDHS regime  
 (Tab. 2c). These values were lower than those observed in  $G_0G_{20}$ .

Those results are consistent with a  $G_0G_{20}$  response resulting  
 from the recruitment of initial genetic variance, independently  
 of the population size, and a later response based on mutational  
 variance being less effective in small than in large populations.  
 To confirm those results, we performed a principal component  
 analysis (PCA) and explored correlations between input param-  
 eters: initial additive genetic variance  $\sigma_{A_0}^2$ , mutational variance  
 $\sigma_M^2$  and residual variance  $\sigma_E^2$ , and descriptors of the response to  
 selection:  $G_0G_{20}$ , number of breakpoints, first slope and greatest  
 slope. In line with our interpretation, irrespective of the selection  
 regime,  $\sigma_{A_0}^2$  positively correlated with  $G_0G_{20}$ , and  $\sigma_M^2$  positively  
 correlated with the first (after  $G_1$ ) and greatest slope (Fig. S4).  
 Note that this stochastic process of mutation occurrence and fixa-  
 tion resulted in large differences among replicates, as illustrated  
 by the breadth of the response (shaded areas in Fig. 1).

**Evolution of genetic diversity:** Because of the well established  
 role of standing variation in selection response, we focused on  
 its temporal dynamics. Standing variation in our experiment  
 consisted in residual heterozygosity found in the initial inbred  
 lines. Starting with a mean residual heterozygosity of  $3.0 \times 10^{-3}$   
 at  $G_0$  (Tab. 2c), we observed a consistent decrease throughout  
 selfing generations until the mutation-drift-equilibrium was  
 reached (Fig. S5). Without selection the mean values reached  
 $\approx 7.0 \times 10^{-4}$  at  $G_{20}$ . Considering a haploid Wright-Fisher pop-  
 ulation and the infinite allele model, the neutral prediction of  
 equilibrium heterozygosity is  $E(H) = \frac{\theta}{1+\theta}$  with  $\theta = 2N_e\mu$ . This  
 translated into an estimate of  $N_e = 1.94$  close to the values we  
 obtained from the harmonic mean of  $N_e$  estimated from TMRCAs  
 (Tab. 2c).

Concerning the number of polymorphic loci, a mutation-



1 drift-equilibrium was reached in all cases except for the LDNS  
 2 selection regime (Fig. S6). The equilibrium value depended on  
 3 the census population size: around 6 polymorphic loci with high  
 4 drift (HDHS and HDNS), 40 polymorphic loci under LDHS, and  
 5 > 66 polymorphic loci after 20 generations under LDNS (Tab. 2c  
 6 (c) and Fig. S6). Altogether, our results show that the mean  
 7 heterozygosity was affected neither by drift, nor by selection,  
 8 but instead by the mutation rate. On the contrary, the number of  
 9 polymorphic loci depended on the census population size.

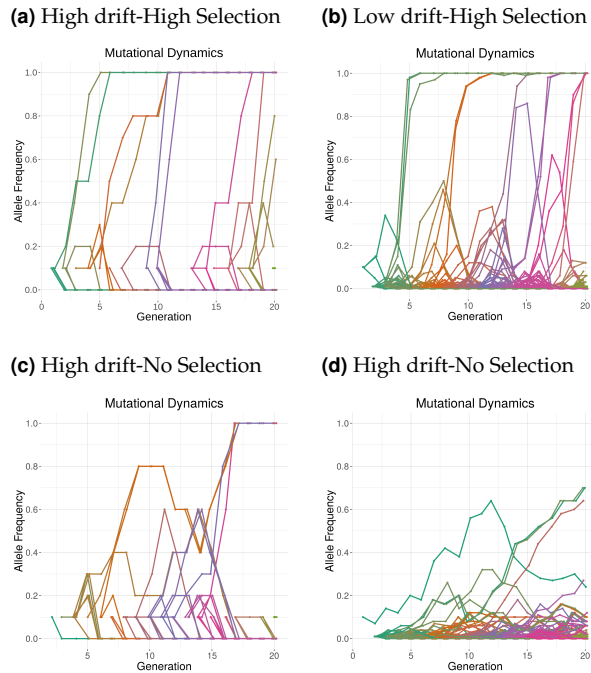

**Figure 3 Evolution of allele frequencies within families under four simulated regimes.** Examples of mutational fates are given for HDHS (a), LDHS (b), HDNS (c), LDNS (d). Mutations are recorded only when occurring in one of the selected progenitors, and corresponding frequencies are computed over all selected individuals. For example under High Drift regimes, the initial frequency of a mutation occurring in any given progenitor within a family is  $1 \div (2 \times 5)$  as 5 diploid individuals are selected at each generation. Under Lower Drift regimes, the mutation initial frequency equals  $1 \div (2 \times 50)$ .

10 **The dynamics of de novo mutations:** Evolution of frequencies  
 11 of new mutations revealed three fates: fixation, loss, and rare  
 12 replacement by incoming mutation at the same locus. The four  
 13 regimes strikingly differed in their mutational dynamics (Fig. 3).  
 14 Under HDHS, most mutations quickly reached fixation (3.8 gen-  
 15 erations), with an average of 7.7 fixed mutations/population in  
 16 20 generations (Tab. 2c). The corresponding Low Drift regime  
 17 (LDHS) displayed longer fixation time 5.9 generations, and an  
 18 average of 10 fixed mutations/family (Tab. 2c). No selection  
 19 regimes tended to exhibit a depleted number of fixed mutations,  
 20 with no fixation under LDNS after 20 generations. Variation  
 21 around the mean fixation time was substantial across all regimes  
 22 Fig. S7. In sum, HDHS was characterized by the fast fixation  
 23 of new mutations, 53% of which were fixed within 2 to 3 gen-  
 24 erations which contrasted to 15% under LDHS or 17% under  
 25 HDNS. Selection therefore increased the number of fixed muta-

tions while decreasing their fixation time.

### Effects of mutations:

(a) High drift-High Selection

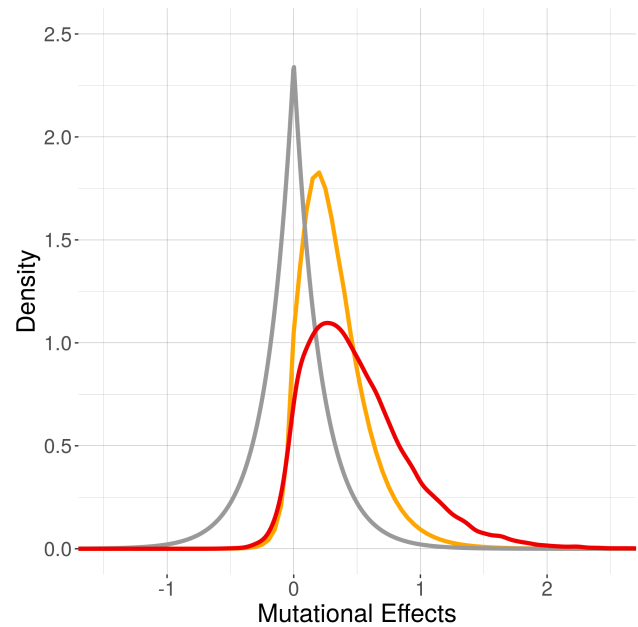

(b) Low drift-High Selection

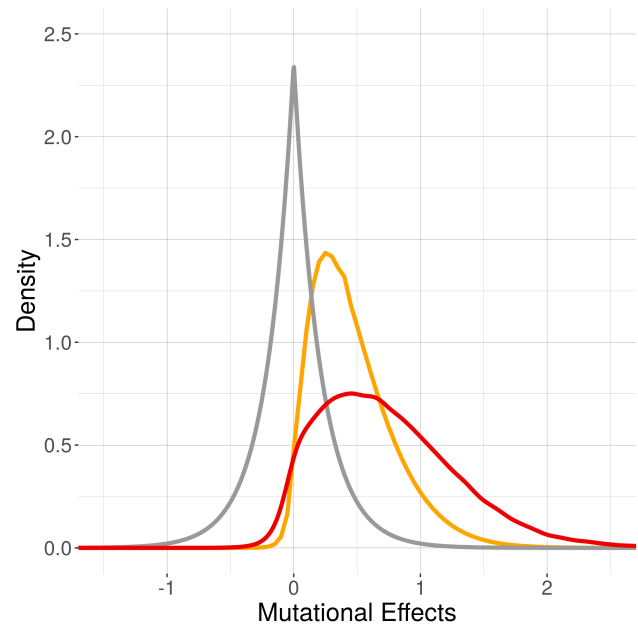

**Figure 4 Distribution of effects of incoming and fixed mutations under High Selection regimes.** Density distributions for the HDHS (a) and the LDHS (b) regime are shown for all incoming mutational effects in grey — reflected exponential distribution —, and fixed mutations over 2000 simulations in red. Theoretical expectations from (Eq. 16) are plotted in gold.

Beyond fixation time, a key aspect of our work was to investigate the impact of drift and selection on the type of fixed mutations, best summarized by their genotypic effects. In order

1 to do so, we compared the distribution of incoming mutations  
 2 to that of fixed mutations. We evidenced a strong depletion of  
 3 deleterious mutations together with a striking enrichment in  
 4 beneficial mutations under the two Selection regimes, HDHS  
 5 (quantile 5%=-0.02, median value=0.43, 95% quantile=1.3) and  
 6 LDHS (quantile 5%=0.011, median value=0.66, 95% quantile=1.7)  
 7 (Fig. 4). We also derived a theoretical expectation from Kimura's  
 8 allele fixation probability using the selection coefficient computed  
 9 in the case of truncation selection (Eq: 16). Accounting for  
 10 the specificities of our selection procedure we found under both  
 11 selection regimes, a slight excess of detrimental mutations, and  
 12 a large excess of beneficial mutations as compared to Kimura's  
 13 predictions. Note however that, comparatively, the excess of  
 14 detrimental mutations was reduced under HDHS than under  
 15 LDHS (Fig. 4).

16 As expected, selection generated a relation between the av-  
 17 erage size of a mutation and its time to fixation : the higher the  
 18 effect of the mutation, the lower the time to fixation (Fig. 5 (a)  
 19 and Fig. 5 (b)). Comparison between HDHS and LDHS re-  
 20 vealed interesting features: under high drift, the average effect  
 21 of mutations fixed was lower and variance around mutational  
 22 effects tended to decrease correlatively with fixation time so that  
 23 large size mutations were all fixed during the first generation  
 24 while they persisted at subsequent generations under Low Drift  
 25 (Fig. 5 (a) and Fig. 5 (b)).

26 In sum, our two selection regimes lead to an enrichment of  
 27 beneficial mutations. Compared with LDHS, HDHS regime  
 28 fixed fewer detrimental mutations but the average effect of fixed  
 29 beneficial mutations was smaller.

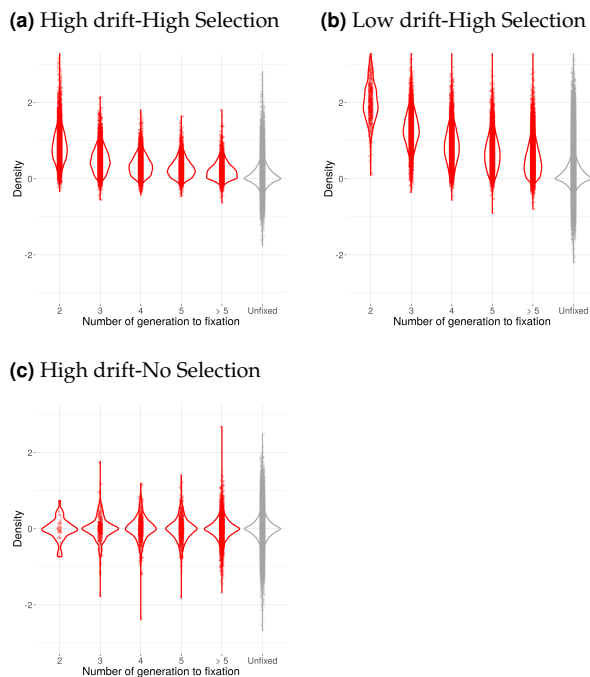

**Figure 5** Violin plots of raw mutational effects according to fixation time under three simulated regimes. Plots are indicated for fixed (red) and lost (grey) mutations under HDHS (a), LDHS (b) and HDNS (c). Note that under LDNS, we obtained very few fixed mutations so that we were unable to draw the corresponding distribution.

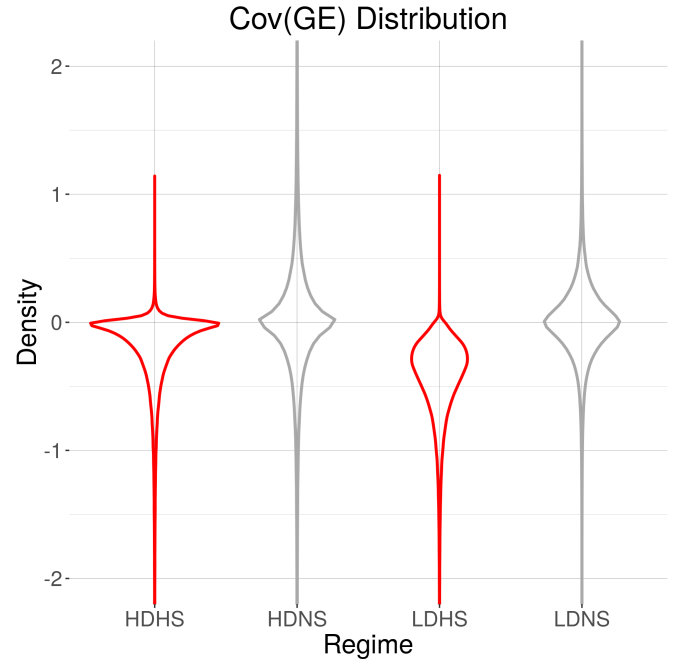

**Figure 6** Violin plots of  $\text{Cov}(G_{|\text{selected}}, E_{|\text{selected}})$  under four simulated regimes. Violin plots were computed over 2000 simulations and 4 families, four families and across all generations under regimes with High Selection in red (HDHS, LDHS), and regimes with No Selection in grey (HDNS, LDNS).

**Covariation between mutational and environmental effects** A puzzling observation was that normalizing raw mutational effects by the environmental standard deviation translated into a distortion of the distribution so that the median value of fixed effects increased by 0.3 (from 0.4 to 0.72) under HDHS and by 0.2 under LDHS (Tab. 2 and Fig. S8). Similarly, 95% quantile increased by 1.2 (from 1.3 to 2.5) under HDHS and 0.66 (from 1.7 to 2.4) under LDHS. Hence, normalization distortion resulted in much more similar fixed mutations effects distribution under HDHS and HDNS. This was due to a non-zero negative genetic-environment covariance in selected individuals. Indeed, conditioning on the subset of selected individual, we obtained negative estimate of  $\text{Cov}(G_{|\text{selected}}, E_{|\text{selected}})$  both under HDHS and LDHS, with a median value (resp. 5% and 95% quantile) of -0.11 (resp. -0.88 and 0.029) under HDHS and -0.37 (resp. -1.1 and -0.072) under LDHS. In contrast, with no selection, values of randomly chosen individual  $\text{Cov}(G_{|\text{random}}, E_{|\text{random}})$  were centered around 0 as expected. The evolution of  $\text{Cov}(G_{|\text{selected}}, E_{|\text{selected}})$  through time (Fig. S9) evidenced a high stochasticity among generations but no temporal autocorrelation Fig. S9. In other words, this means that because of the negative correlation between residual environmental effects and genetic effects induced by selection, mutational effects depend on the environment at the generation they have been selected for.

## Discussion

Population and quantitative genetics provide theoretical frameworks to investigate selection responses and underlying multilocus adaptive dynamics. Here, we focused on Saclay DSEs which were specifically designed to depict the evolutionary mechanisms behind the response to selection of a highly complex trait

**Table 2** Descriptive statistics of the selection response dynamics in observed F252 genetic background (a), observed MBS genetic background (b) and the 4 simulated regimes (c).

(a) HDHS observed in F252 genetic background

| F252 families:                     | FE1           | FE2           | FVL (G13)   | FL2.1       | FL2.2        |
|------------------------------------|---------------|---------------|-------------|-------------|--------------|
| Cumul. Resp. in DTF                | -4.27         | -5.34         | 11.32       | 3.19        | 2.60         |
| Linear Regression Coefficient (SD) | -0.21 (0.048) | -0.22 (0.037) | 0.86 (0.17) | 0.11 (0.04) | 0.12 (0.035) |
| Adjusted R-squared                 | 0.49          | 0.63          | 0.65        | 0.23        | 0.34         |
| Linear regression p-value          | 0.000269      | 1.074 e-05    | 0.000305    | 0.016       | 0.00353      |

(b) HDHS observed in MBS genetic background

| MBS families:                      | ME1          | ME2          | ML1         | ML2         |
|------------------------------------|--------------|--------------|-------------|-------------|
| Cumul. Resp. in DTF                | -9.34        | -11.72       | 8.64        | 11.05       |
| Linear Regression Coefficient (SD) | -0.41 (0.03) | -0.42 (0.04) | 0.24 (0.05) | 0.46 (0.06) |
| Adjusted R-squared                 | 0.89         | 0.84         | 0.57        | 0.76        |
| Linear regression p-value          | 1.01 e-10    | 3.52 e-09    | 4.46 e-05   | 1.56 e-07   |

(c) Simulated regimes <sup>a</sup>

| Simulated regimes:                                                                                 | HDHS                 | HDNS                 | LDHS                 | LDNS                      |
|----------------------------------------------------------------------------------------------------|----------------------|----------------------|----------------------|---------------------------|
| Simulated Cumul. Resp.                                                                             | 13 (5.2)             | 1.7 (1.7)            | 24 (6.2)             | 1.3 (1.3)                 |
| Linear Regression Coefficient (SD)                                                                 | 0.49 (0.2)           | 0.067 (0.066)        | 1.1 (0.27)           | 0.035 (0.035)             |
| R2 Linear Response                                                                                 | 0.95                 | 0.47                 | 0.99                 | 0.44                      |
| G <sub>0</sub> G <sub>20</sub> Response (SD)                                                       | 1.6 (1.9)            | 0.26 (0.38)          | 1.7 (2.1)            | 0.3 (0.42)                |
| First Slope (SD)                                                                                   | 0.59 (0.52)          | 0.2 (0.3)            | 0.96 (0.46)          | 0.067 (0.091)             |
| Greatest Slope (SD)                                                                                | 0.56 (0.49)          | 0.16 (0.24)          | 1 (0.46)             | 0.08 (0.098)              |
| G <sub>20</sub> TMRCA (SD)                                                                         | 3.9 (1.9)            | 7.6 (4.3)            | 6.4 (2.8)            | > 20 (0.098) <sup>b</sup> |
| N <sub>e</sub> <sup>Coal</sup> <sub>e(G<sub>20</sub>)</sub> (Ne from G <sub>20</sub> TMRCA) (SD)   | 2.5 (1.2)            | 4.8 (2.7)            | 3.3 (1.4)            | > 10 (0.05) <sup>b</sup>  |
| N <sub>e</sub> <sup>Coal</sup> <sub>e(G<sub>1-20</sub>)</sub> Ne (Harmonic Ne from all TMRCA) (SD) | 1.8 (0.22)           | 2.5 (0.37)           | 2 (0.22)             | 2.8 (0.00096)             |
| N <sub>e</sub> <sup>Var(o)</sup> <sub>e(G<sub>1-20</sub>)</sub> (Harmonic Ne from Var Off) (SD)    | 3 (0.44)             | 4.1 (0.6)            | 16 (3)               | 42 (4.6)                  |
| Ne required for the Simulated Cumul. Resp. (SD)                                                    | 3.3 (2.0)            | 0.4 (0.4)            | 9.0 (21.1)           | 0.3 (0.3)                 |
| Heterozygosity at G <sub>0</sub> (SD)                                                              | 0.003 (0.003)        | 0.003 (0.004)        | 0.003 (0.003)        | 0.003 (0.004)             |
| Heterozygosity at G <sub>20</sub> (SD)                                                             | 0.00083<br>(0.00047) | 0.00073<br>(0.00043) | 0.00087<br>(0.00021) | 0.00072<br>(0.00014)      |
| Number Of Polymorphism at G <sub>0</sub> (SD)                                                      | 3 (3)                | 3.2 (4.1)            | 3.1 (3.3)            | 3.3 (4.1)                 |
| Number Of Polymorphism at G <sub>20</sub> (SD)                                                     | 5.1 (2.5)            | 6 (3.1)              | 40 (8.8)             | 66 (9.2)                  |
| Simulation Fraction Without Any Fixed Mutation                                                     | 0                    | 0.0025               | 0                    | 0.999 <sup>c</sup>        |
| Fixation Time in generations (SD)                                                                  | 3.8 (1.7)            | 7.2 (3)              | 5.9 (2.3)            | NA <sup>c</sup>           |
| Number Of Fixed Mutation Per Family (SD)                                                           | 7.7 (2.6)            | 2.3 (1.4)            | 10 (3)               | NA <sup>c</sup>           |
| Q5 Fixed Mut. effect (Non Normalized)                                                              | -0.019               | -0.5                 | 0.011                | NA <sup>c</sup>           |
| Q50 Fixed Mut. effect (Non Normalized)                                                             | 0.43                 | -0.00086             | 0.66                 | NA <sup>c</sup>           |
| Q95 Fixed Mut. effect (Non Normalized)                                                             | 1.3                  | 0.5                  | 1.7                  | NA <sup>c</sup>           |
| Q5 Fixed Mut. effect (Normalized)                                                                  | -0.034               | -0.44                | 0.015                | NA <sup>c</sup>           |
| Q50 Fixed Mut. effect (Normalized)                                                                 | 0.72                 | -0.00054             | 0.86                 | NA <sup>c</sup>           |
| Q95 Fixed Mut. effect (Normalized)                                                                 | 2.5                  | 0.42                 | 2.4                  | NA <sup>c</sup>           |
| CovGE (SD)                                                                                         | -0.23 (0.35)         | -0.0035 (0.68)       | -0.45 (0.34)         | -0.0011 (0.36)            |
| Q5 CovGE                                                                                           | -0.88                | -0.87                | -1.1                 | -0.5                      |
| Q50 CovGE                                                                                          | -0.11                | 0                    | -0.37                | -0.00017                  |
| Q95 CovGE                                                                                          | 0.029                | 0.86                 | -0.072               | 0.49                      |

<sup>a</sup> All values are computed as the mean (resp. SD or quantile, when indicated) over 2000 simulations.

<sup>b</sup> Under LDNS, we expected a neutral coalescent time around 98 generations well beyond the 20 simulated generations, which provided highly biased G<sub>20</sub> TMRCA and N<sub>e</sub> estimators.

<sup>c</sup> Under LDNS, we obtained very few fixed mutation so that we were unable to compute the corresponding statistics.



— with a high mutational target — in small populations evolving under truncation selection (1% of selected individual), limited recombination (total selfing regime) and limited standing variation. Our main motivation was to explore how such a combination of unusual conditions, at the limits of parameters boundaries of classic models, can sustain the long-term maintenance of additive genetic variation and a significant selection response with no observed load (annual field observations). In this purpose we devised forward individual-based simulations that explicitly modeled our Saclay DSEs, and relied on theoretical predictions to investigate the interplay of evolutionary forces and patterns associated with fixation of mutations.

**Mutation accounts for the maintenance of small but sufficient additive genetic variation** The three determinants of the observed selection response were best summarized by three variance components namely, the initial additive variance  $\sigma_{A0}^2$ , the environmental variance  $\sigma_E^2$ , and the mutational variance  $\sigma_M^2$  (Fig: S4). Quantitatively, we demonstrated the importance of both initial standing variation and the necessity of a constant mutational input to explain the significant selection response in the two Saclay DSEs (Fig: 1 & S4). This result was consistent with previous reports (Durand *et al.* 2010, 2015) and showed that the first selection response between  $G_0$  and  $G_1$  was correlated with  $\sigma_{A0}^2$ , while response in subsequent generations was correlated with  $\sigma_M^2$  (Fig: S4). In our simulations, we chose initial values for variance components that closely matched previous estimates in the Saclay DSE derived from the MBS inbred line (Durand *et al.* 2010). The small value for initial additive variance came from the use of commercial inbred lines in our experimental evolution setting. It sharply contrasted with more traditional settings where distant genetic material and crosses are often performed to form an initial panmictic population from which selection is applied (Kawecki *et al.* 2012). While crucial in the first generation (Fig: S4),  $\sigma_{A0}^2$  was quickly exhausted. The long-term selection response was sustained by  $\mathbb{E}(\sigma_M^2) = 3.38 \times 10^{-2}$  which corresponded to an expected mutational heritability of  $\mathbb{E}(\frac{\sigma_M^2}{\sigma_E^2}) \approx \frac{\mathbb{E}(\sigma_M^2)}{\mathbb{E}(\sigma_E^2)} = 1.5 \times 10^{-2}$  (in units of residual variance per generation). These values stand as higher bounds to what was previously described in other species/complex traits (Keightley 2010; Walsh and Lynch 2018).

We further implemented an additive incremental mutation model (Clayton and Robertson 1955; Kimura 1965; Walsh and Lynch 2018). This model assumed non-limiting mutational inputs, and has been shown to be particularly relevant in systems where, just like ours, effective recombination is limited (Charlesworth 1993; Walsh and Lynch 2018). Alternative non-additive model such as the House Of Cards (HoC) that sets random allelic effect upon occurrence of a new allele (Kingman 1978; Turelli 1984) — rather than adding effects incrementally — would have likely resulted in smaller estimate of  $\sigma_M^2$  (Hodgins-Davis *et al.* 2015). Whether the incremental model or the HoC or a combination of both such as the regression mutation model Zeng and Cockerham (1993) was better suited to mimic our Saclay DSEs is an open question. However several lines of evidence argue in favour of a non-limiting mutational input in our setting. First, the architecture of maize flowering time is dominated by a myriad of QTLs of small additive effects (Buckler *et al.* 2009). Over 100 QTLs have been detected across maize lines (Buckler *et al.* 2009), and over 1000 genes have been shown to be involved in its control in a diverse set of landraces (Romero Navarro *et al.* 2017). Second, in Saclay

DSEs alone, transcriptomic analysis of apical meristem tissues has detected 2,451 genes involved in the response to selection between early and late genotypes, some of which being interconnected within the complex gene network that determines the timing of floral transition (Tenailon *et al.* 2018). This suggests that not only the number of loci is considerable, but also that their connection within a network further enhances the number of genetic combinations, and in turn, the associated phenotypic landscape. The breadth of the mutational target is a key parameter for adaptation (Höllinger *et al.* 2019). Together, our results suggest that our large mutational target compensates for the small population sizes, and triggers the long-term maintenance of heterozygosity, and genetic diversity at the population level after the selection-drift-mutation equilibrium is reached, i.e. after three to five generations. Noteworthy the expected level of heterozygosity in our controls (No Selection models, NS) corresponded to neutral predictions (Crow and Maruyama 1971; Kimura 1969).

**Quick fixation of *de novo* mutations drive Saclay DSEs selection response** The observed fixation time of mutations without selection is expected under standard neutral theory. The Kingman coalescent indeed predicts a TMRCA around 8 generations for a population size of 5 which matched closely our observed value of 7.6 obtained under HDNS. With selection, instead, we observed a quick fixation of mutations in three to four generations under HDHS. Likewise, the number of fixed mutation increased from 2.3 in HDNS to 7.7 in HDHS (Tab. 2). Note that while one would expect emerging patterns of hard sweeps following such rapid mutation fixation, our selfing regime which translated into small effective recombination likely limits considerably genetic hitchhiking footprints, so that such patterns may be hardly detectable.

Short fixation times made the estimate of effective population sizes challenging. We used two estimates of  $N_e$  to shed light on different processes entailed in HDHS stochastic regime. These estimates were based on expected TMRCA and on the variance in the number of offspring (Crow and Kimura 1971), respectively. We found the latter to be greater than the former. This can be explained by the fact that selection is known to substantially decrease effective population on quantitative trait submitted to continuous selection, because part of the selective advantage of an individuals accumulates in offsprings over generations (Santiago and Caballero 1995), and because selection on the phenotypic value acts in parts on non-heritable variance (i.e., on the environmental variance component of  $V_P$  (Chantepie and Chevin 2020)). Note that estimate of  $N_e$  based on the known genealogical structure allow to compute a "realized" estimate that accounts for these effects. However, this is not without drawback, as TMRCA were much shorter than expected, a result consistent with the occurrence of multiple merging along pedigrees, i.e. multiple individuals coalescing into a single progenitor. Multiple merger coalescence may actually be better suited to describe rapid adaptation than the Kingman coalescent (Neher 2013).

Both fixation time and probability depend on the selection coefficient  $s$  and the initial frequency of the mutation in the population. In our setting, conditioning on its appearance in the subset of selected individuals, the initial frequency of a mutation was 0.10, which was unusually high and translated into selection and drift exerting greater control over mutations. Indeed, in more traditional drift regimes, even when an allele is strongly selected ( $2N_e s \gg 1$ ), drift dominates at mutation occurrence,

1 *i.e.* with two absorbing states for allele frequency near zero and  
2 one (Walsh and Lynch 2018). In other words, in HDHS regime,  
3 selection induced repeated population bottlenecks so that it can  
4 not be decoupled from drift.

#### 5 High stochasticity promotes the fixation of small effect mutations

6 Interplay between drift and selection promoted stochasticity in  
7 our setting, which manifested itself in various ways : (i) through  
8 the selection response, with different families exhibiting con-  
9 trasting behaviors, some responding very strongly and others  
10 not, Fig. 1; (ii) through the dynamics of allele fixation (Fig. 2 &  
11 3); and (iii) through the distribution of  $Cov(GE)$  Fig. 6. Stochas-  
12 ticity tightly depends on census population size (Hill 1982a,b).  
13 Unexpectedly, however, we found a bias towards stochasticity  
14 as illustrated by a bias towards the fixation of advantageous  
15 mutations compared with the expectation (Fig. 4). Comparison  
16 of the distributions of the mutational raw effects indicated that,  
17 among advantageous mutations, a greater proportion of those  
18 with small effects were fixed under the High Drift than under  
19 the Low Drift regime (Fig. 4 (a) versus (b) ). This result echoes  
20 those of Silander *et al.* (2007), who showed — using experimental  
21 evolution with bacteriophage — that fitness declines down to  
22 a plateau in populations where drift overpower selection. The  
23 authors note: "If all mutations were of small effect, they should  
24 be immune to selection in small populations. This was not ob-  
25 served; both deleterious and beneficial mutations were subject  
26 to selective forces, even in the smallest of the populations."

27 What are the underlying mechanism behind this fixation bias?  
28 We found a negative covariance between selected genotypes and  
29 their corresponding environmental values, that modified the mu-  
30 tational effect to an apparent mutational effect perceived by the  
31 environment. The negative  $Cov(GE)$  arose mechanically from  
32 selection of two independent random variables, whatever the  
33 sampling size as illustrated in Fig. S10 and Fig. S11. This effect  
34 reminds the so-called Bulmer effect (Bulmer 1971), that causes  
35 a reduction of genetic variance due to the effect of selection on  
36 the covariance between unlinked loci. Interestingly, under the  
37 High Drift regime, we observed a less negative  $Cov(GE)$  on  
38 average than with a 10 times higher census size (Low Drift).  
39 This translated, after dividing by the environmental standard  
40 deviation, to a greater apparent effect of small mutations under  
41 the High Drift regime. In other words, High Drift-High Selec-  
42 tion tends to magnify mutational effects from an environmental  
43 perspective. In support of this explanation, normalization by the  
44 environmental standard deviation actually erased the difference  
45 between the two distributions of mutational effect (under low  
46 and High Drift, Fig. S8). Unlike the Bulmer effect however, this  
47 one was restricted to the generation of mutation occurrence, but  
48 favored long-term fixation of slightly advantageous mutations  
49 by a transient increase of their frequency. Because of a significant  
50 variance of  $Cov(GE)$ , this effect on small effect mutation fixation  
51 was mostly stochastic. Therefore, we interpreted the fixation  
52 of a high proportion of slightly beneficial mutations, and their  
53 significant contribution to selection response, by the less efficient  
54 exploration of the initial distribution per simulation (increasing  
55 their prevalence) but the stochastic "help" of a lesser negative  
56  $Cov(GE)$ .

#### 57 Deficit of fixation of deleterious mutations suggests a limited cost of 58 selection

59 As expected, we observed that selection decreased  
60 the number of segregating polymorphic loci at equilibrium com-  
61 pared to regimes without selection (Tab. 2). Interestingly how-  
62 ever, this effect was reduced for small population size. Under

62 High Drift, selection induced an average loss of a single poly-  
63 morphism at equilibrium (HDHS vs. HDNS, Tab. 2) while under  
64 the Low Drift regime over 20 polymorphisms were lost (LDHS  
65 vs. LDNS, Tab. 2). A similar trend was recovered at the mutation  
66 fixation level where on average 7.7 mutations were fixed under  
67 the High Drift-High Selection and only 10 under Low Drift-High  
68 Selection. In other words, the 10-fold population increase did  
69 not translate into a corresponding increase in the number of seg-  
70 regating and fixed mutations, as if there was a diminishing cost  
71 with decreasing population size. Under High Drift (resp. Low  
72 Drift), at each generation 500 (resp. 5000) offspring of  $2 \times 1000$   
73 loci were produced. Considering a mutation rate per locus of  
74  $6000 \times 30 \times 10^{-9}$ , (*i.e.* (Clark *et al.* 2005)), it translated into 180  
75 mutations events (resp. 1800 mutations events). However most  
76 mutations are lost as only mutations occurring in the subset of  
77 selected individuals survive. The initial frequency of a mutation  
78 in this subset, *i.e.* of size 5 or 50, is  $\frac{1}{10}$  under High Drift and  $\frac{1}{100}$   
79 under Low Drift. In the former, the interplay between the ini-  
80 tial frequency and selection intensity allows a better retention  
81 of beneficial mutations of small effect (Fig. 4) than in the latter.  
82 Interestingly at equilibrium, we also observed a higher level of  
83 residual heterozygosity with selection than without, irrespective  
84 of population size, suggesting a small impact of selection in the  
85 long-term heterozygosity maintenance. Overall, our High Drift-  
86 High Selection regime maintains a small, but sufficient number  
87 of polymorphisms for the selection response to be significant.

88 Our selection response evidenced a deficit of fixation of dele-  
89 terious mutations and hence a modest genetic load (Fig. 4 and  
90 S8). We identified three reasons behind this observation. Firstly,  
91 in our design, the selection intensity of 1% was applied on the  
92 trait. Hence, in contrast to the infinitesimal model for which a  
93 high number of polymorphic loci are expected to individually  
94 experience a small selection intensity, selection intensity was  
95 "concentrated" here on a restricted number of loci, *i.e.* those for  
96 which polymorphisms were segregating. Secondly, we applied  
97 truncation selection whose efficiency has been demonstrated  
98 (Crow and Kimura 1979). The authors noted: "It is shown, for  
99 mutations affecting viability in *Drosophila*, that truncation selec-  
100 tion or reasonable departures therefrom can reduce the mutation  
101 load greatly. This may be one way to reconcile the very high  
102 mutation rate of such genes with a small mutation load." Thirdly,  
103 the lack of interference between selected loci in our selection  
104 regime may further diminish the selection cost (Hill and Robert-  
105 son 1966). Reduced interference in our system is indeed expected  
106 from reduced initial diversity and quick fixation of *de novo* mu-  
107 tations. Whether natural selection proceeds through truncation  
108 selection or Gaussian selection is still a matter of debate (Crow  
109 and Kimura 1979). Measuring the impact of these two types  
110 of selection on the genealogical structure of small populations  
111 including on the prevalence of multiples mergers will be of great  
112 interest to better predict their fate.

113 This under-representation of deleterious variant echoes with  
114 empirical evidence that in crops, elite lines are impoverished in  
115 deleterious variants compared to landraces owing to a recent  
116 strong selection for yield increase (Gaut *et al.* 2015). Likewise,  
117 no difference in terms of deleterious variant composition were  
118 found between sunflower landraces and elite lines (Renaut and  
119 Rieseberg 2015). Hence, while the dominant consensus is that the  
120 domestication was accompanied by a genetic cost linked to the  
121 combined effects of bottlenecks, limited effective recombination  
122 reducing selection efficiency, and deleterious allele surfing by  
123 rapid population expansion (Moyers *et al.* 2018), recent breeding

1 highlights a distinct pattern. We argue that our results may help  
2 to understand this difference because under High Drift-High  
3 Selection, a regime likely prevalent in modern breeding, genetic  
4 load is reduced. More generally, our results may provide useful  
5 hints to explain the evolutionary potential of selfing populations  
6 located at the range margins. Just like ours, such populations are  
7 generally small, display both, inbreeding and reduced reduced  
8 standing variation (Pujol and Pannell 2008) and are subjected  
9 environmental and demographic stochasticity.

10 **Conclusion** In conclusion, our High Drift-High Selection  
11 regime with non-limiting mutation highlights an interesting  
12 interplay between drift and selection that together promote the  
13 quick fixation of adaptive *de novo* mutations fueling a significant  
14 but stochastic selection response. Interestingly, such selection  
15 response is not impeded by the fixation of deleterious mutations  
16 but displays instead a limited cost. Our results provide an expla-  
17 nation for patterns highlighted during recent breeding as well as  
18 the high colonization ability of small selfing populations located  
19 at species range margins. They also call for a better mathemati-  
20 cal description of the multilocus adaptive process sustaining the  
21 evolution of small populations under intense selection.

## 22 Literature Cited

23 Berg, J. J. and G. Coop, 2014 A Population Genetic Signal of  
24 Polygenic Adaptation. *PLoS Genetics* **10**: e1004412.  
25 Buckler, E. S., J. B. Holland, P. J. Bradbury, C. B. Acharya, P. J.  
26 Brown, *et al.*, 2009 The genetic architecture of maize flowering  
27 time. *Science* **325**: 714–718.  
28 Bulmer, M. G., 1971 The Effect of Selection on Genetic Variability.  
29 *The American Naturalist* **105**: 201–211.  
30 Burke, M. K., 2012 How does adaptation sweep through the  
31 genome? Insights from long-term selection experiments. *Pro-  
32 ceedings of the Royal Society B: Biological Sciences* **279**: 5029–  
33 5038.  
34 Burke, M. K., G. Liti, and A. D. Long, 2014 Standing genetic vari-  
35 ation drives repeatable experimental evolution in outcrossing  
36 populations of *saccharomyces cerevisiae*. *Molecular Biology  
37 and Evolution* **31**: 3228–3239.  
38 Caballero, A., M. A. Toro, and C. Lopez-Fanjul, 1991 The re-  
39 sponse to artificial selection from new mutations in *Drosophila  
40 melanogaster*. *Genetics* **128**: 89–102.  
41 Carr, R. N. and R. F. Nassar, 1970 Effects of Selection and Drift  
42 on the Dynamics of Finite Populations. I. Ultimate Probability  
43 of Fixation of a Favorable Allele. *Biometrics* **26**: 41.  
44 Chantepie, S. and L. Chevin, 2020 How does the strength of  
45 selection influence genetic correlations? *Evolution Letters* **4**:  
46 468–478.  
47 Charlesworth, B., 1993 Directional selection and the evolution of  
48 sex and recombination. *Genetical Research* **61**: 205–224.  
49 Chevin, L. M. and F. Hospital, 2008 Selective sweep at a quantita-  
50 tive trait locus in the presence of background genetic variation.  
51 *Genetics* **180**: 1645–1660.  
52 Clark, R. M., S. Tavaré, and J. Doebley, 2005 Estimating a nu-  
53 cleotide substitution rate for maize from polymorphism at a  
54 major domestication locus. *Molecular Biology and Evolution*  
55 **22**: 2304–2312.  
56 Clayton, G. and A. Robertson, 1955 Mutation and Quantitative  
57 Variation. *The American Naturalist* **89**: 151–158.  
58 Crow, J. F. and M. Kimura, 1971 *An Introduction to Population  
59 Genetics Theory*, volume 26. Blackburn Press.

Crow, J. F. and M. Kimura, 1979 Efficiency of truncation selec- 60  
tion. *Proceedings of the National Academy of Sciences of the* 61  
*United States of America* **76**: 396–399. 62  
Crow, J. F. and T. Maruyama, 1971 The number of neutral alleles 63  
maintained in a finite, geographically structured population. 64  
*Theoretical Population Biology* **2**: 437–453. 65  
De Leon, N. and J. G. Coors, 2002 Twenty-four cycles of mass 66  
selection for prolificacy in the Golden Glow maize population. 67  
*Crop Science* **42**: 325–333. 68  
Desai, M. M. and D. S. Fisher, 2007 Beneficial mutation-selection 69  
balance and the effect of linkage on positive selection. *Genetics* 70  
**176**: 1759–1798. 71  
Dudley, J. W. and R. J. Lambert, 2010 100 Generations of Selec- 72  
tion for Oil and Protein in Corn. In *Plant Breeding Reviews*, 73  
volume 24, pp. 79–110, John Wiley and Sons, Inc., Oxford, UK. 74  
Durand, E., S. Bouchet, P. Bertin, A. Ressayre, P. Jamin, *et al.*, 75  
2012 Flowering time in maize: Linkage and epistasis at a major 76  
effect locus. *Genetics* **190**: 1547–1562. 77  
Durand, E., M. I. Tenaillon, X. Raffoux, S. Thépot, M. Falque, 78  
*et al.*, 2015 Dearth of polymorphism associated with a sus- 79  
tained response to selection for flowering time in maize. *BMC* 80  
*Evolutionary Biology* **15**: 103. 81  
Durand, E., M. I. Tenaillon, C. Ridel, D. Coubriche, P. Jamin, *et al.*, 82  
2010 Standing variation and new mutations both contribute to 83  
a fast response to selection for flowering time in maize inbreds. 84  
*BMC Evolutionary Biology* **10**: 2. 85  
Falconer, D. S., 1971 Improvement of litter size in a strain of mice 86  
at a selection limit. *Genetical Research* **17**: 215–235. 87  
Fisher Ronald Aylmer, S., 1930 *The genetical theory of natural* 88  
*selection..* Oxford/Clarendon Press. 89  
Gaut, B. S., C. M. Diez, and P. L. Morrell, 2015 Genomics and the 90  
Contrasting Dynamics of Annual and Perennial Domestica- 91  
tion. *Trends in Genetics* **31**: 709–719. 92  
Gerrish, P. J. and R. E. Lenski, 1998 The fate of competing ben- 93  
eficial mutations in an asexual population. *Genetica* **102-103**:  
94 127–144. 95  
Good, B. H., M. J. McDonald, J. E. Barrick, R. E. Lenski, and 96  
M. M. Desai, 2017 The dynamics of molecular evolution over 97  
60,000 generations. *Nature* **551**: 45–50. 98  
Good, B. H., I. M. Rouzine, D. J. Balick, O. Hallatschek, and 99  
M. M. Desai, 2012 Distribution of fixed beneficial mutations 100  
and the rate of adaptation in asexual populations. *Proceedings* 101  
*of the National Academy of Sciences of the United States of* 102  
*America* **109**: 4950–4955. 103  
Haldane, J. B. S., 1927 A Mathematical Theory of Natural and 104  
Artificial Selection, Part V: Selection and Mutation. *Mathemat-* 105  
*ical Proceedings of the Cambridge Philosophical Society* **23**:  
106 838–844. 107  
Hartfield, M., T. Bataillon, and S. Glémin, 2017 The Evolutionary 108  
Interplay between Adaptation and Self-Fertilization. *Trends* 109  
*in Genetics* **33**: 420–431. 110  
Hartfield, M. and S. Glémin, 2014 Hitchhiking of deleterious 111  
alleles and the cost of adaptation in partially selfing species. 112  
*Genetics* **196**: 281–293. 113  
Hermisson, J. and P. S. Pennings, 2017 Soft sweeps and beyond: 114  
understanding the patterns and probabilities of selection foot- 115  
prints under rapid adaptation. *Methods in Ecology and Evo-* 116  
*lution* **8**: 700–716. 117  
Hill, W. G., 1982a Predictions of response to artificial selection 118  
from new mutations. *Genetical Research* **40**: 255–278. 119  
Hill, W. G., 1982b Rates of change in quantitative traits from fixa- 120  
tion of new mutations. *Proceedings of the National Academy* 121



- of Sciences of the United States of America **79**: 142–145.
- Hill, W. G. and A. Caballero, 1992 Artificial Selection Experiments. *Annual Review of Ecology and Systematics* **23**: 287–310.
- Hill, W. G. and J. Rasbash, 1986 Models of long-term artificial selection in finite population with recurrent mutation. *Genetical Research* **48**: 125–131.
- Hill, W. G. and A. Robertson, 1966 The effect of linkage on limits to artificial selection. *Genetical Research* **8**: 269–294.
- Hodgins-Davis, A., D. P. Rice, J. P. Townsend, and J. Novembre, 2015 Gene expression evolves under a house-of-cards model of stabilizing selection. *Molecular Biology and Evolution* **32**: 2130–2140.
- Höllinger, I., P. S. Pennings, and J. Hermisson, 2019 Polygenic adaptation: From sweeps to subtle frequency shifts. *PLoS Genetics* **15**: e1008035.
- Hospital, F. and C. Chevalet, 1996 Interactions of selection, linkage and drift in the dynamics of polygenic characters. *Genetical Research* **67**: 77–87.
- Houle, D., 1989 The Maintenance of Polygenic Variation in Finite Populations. *Evolution* **43**: 1767.
- Jiao, Y., P. Peluso, J. Shi, T. Liang, M. C. Stitzer, *et al.*, 2017 Improved maize reference genome with single-molecule technologies. *Nature* **546**: 524–527.
- Kamran-Disfani, A. and A. F. Agrawal, 2014 Selfing, adaptation and background selection in finite populations. *Journal of Evolutionary Biology* **27**: 1360–1371.
- Kassen, R. and T. Bataillon, 2006 Distribution of fitness effects among beneficial mutations before selection in experimental populations of bacteria. *Nature Genetics* **38**: 484–488.
- Kawecki, T. J., R. E. Lenski, D. Ebert, B. Hollis, I. Olivieri, *et al.*, 2012 Experimental evolution. *Trends in Ecology and Evolution* **27**: 547–560.
- Keightley, P. D., 2010 Mutational Variation and Long-Term Selection Response. In *Plant Breeding Reviews*, pp. 227–247, John Wiley and Sons, Inc., Oxford, UK.
- Kimura, M., 1962 On the probability of fixation of mutant genes in a population. *Genetics* **47**: 713–719.
- Kimura, M., 1965 A stochastic model concerning the maintenance of genetic variability in quantitative characters. *Proceedings of the National Academy of Sciences of the United States of America* **54**: 731–736.
- Kimura, M., 1969 The number of heterozygous nucleotide sites maintained in a finite population due to steady flux of mutations. *Genetics* **61**: 893–903.
- Kimura, M., 1983 *The Neutral Theory of Molecular Evolution*, volume 54. Cambridge University Press.
- Kingman, J. F. C., 1978 A simple model for the balance between selection and mutation. *Journal of Applied Probability* **15**: 1–12.
- Lamkey, K., 1992 Fifty years of recurrent selection in the Iowa stiff stalk synthetic maize population. *Maydica* **37**: 19–28.
- Lande, R., 1979 Quantitative Genetic Analysis of Multivariate Evolution, Applied to Brain: Body Size Allometry. *Evolution* **33**: 402.
- Lande, R. and S. J. Arnold, 1983 The Measurement of Selection on Correlated Characters. *Evolution* **37**: 1210.
- Lillie, M., C. F. Honaker, P. B. Siegel, and Ö. Carlborg, 2019 Bidirectional selection for body weight on standing genetic variation in a chicken model. *G3: Genes, Genomes, Genetics* **9**: 1165–1173.
- Lush, J. L., 1943 Animal breeding plans. *Animal breeding plans* .
- Mackay, T. F., 2010 Mutations and quantitative genetic variation: Lessons from *Drosophila*. *Philosophical Transactions of the Royal Society B: Biological Sciences* **365**: 1229–1239.
- Messer, P. W. and D. A. Petrov, 2013 Population genomics of rapid adaptation by soft selective sweeps. *Trends in Ecology and Evolution* **28**: 659–669.
- Moose, S. P., J. W. Dudley, and T. R. Rocheford, 2004 Maize selection passes the century mark: A unique resource for 21st century genomics. *Trends in Plant Science* **9**: 358–364.
- Moyers, B. T., P. L. Morrell, and J. K. McKay, 2018 Genetic costs of domestication and improvement. *Journal of Heredity* **109**: 103–116.
- Neher, R. A., 2013 Genetic Draft, Selective Interference, and Population Genetics of Rapid Adaptation. *Annual Review of Ecology, Evolution, and Systematics* **44**: 195–215.
- Odhiambo, M. O. and W. A. Compton, 1987 Twenty Cycles of Divergent Mass Selection for Seed Size in Corn 1. *Crop Science* **27**: 1113–1116.
- Parent, B., O. Turc, Y. Gibon, M. Stitt, and F. Tardieu, 2010 Modelling temperature-compensated physiological rates, based on the co-ordination of responses to temperature of developmental processes. *Journal of Experimental Botany* **61**: 2057–2069.
- Pujol, B. and J. R. Pannell, 2008 Reduced responses to selection after species range expansion. *Science* **321**: 96.
- Renaut, S. and L. H. Rieseberg, 2015 The accumulation of deleterious mutations as a consequence of domestication and improvement in sunflowers and other compositae crops. *Molecular Biology and Evolution* **32**: 2273–2283.
- Roberts, R. C., 1967 The limits to artificial selection for body weight in the mouse: IV. Sources of new genetic variance—irradiation and outcrossing. *Genetical Research* **9**: 87–98.
- Robertson, A., 1960 A theory of limits in artificial selection. *Proceedings of the Royal Society of London. Series B. Biological Sciences* **153**: 234–249.
- Romero Navarro, J. A., M. Willcox, J. Burgueño, C. Romay, K. Swarts, *et al.*, 2017 A study of allelic diversity underlying flowering-time adaptation in maize landraces. *Nature Genetics* **49**: 476–480.
- Roze, D., 2016 Background selection in partially selfing populations. *Genetics* **203**: 937–957.
- Santiago, E. and A. Caballero, 1995 Effective size of populations under selection. *Genetics* **139**: 1013–1030.
- Silander, O. K., O. Tenaillon, and L. Chao, 2007 Understanding the evolutionary fate of finite populations: The dynamics of mutational effects. *PLoS Biology* **5**: 922–931.
- Spor, A., D. J. Kvitek, T. Nidelet, J. Martin, J. Legrand, *et al.*, 2014 Phenotypic and genotypic convergences are influenced by historical contingency and environment in yeast. *Evolution* **68**: 772–790.
- Stetter, M. G., K. Thornton, and J. Ross-Ibarra, 2018 Genetic architecture and selective sweeps after polygenic adaptation to distant trait optima. *PLoS Genetics* **14**: 1–24.
- Tavaré, S., 1984 Line-of-descent and genealogical processes, and their applications in population genetics models. *Theoretical Population Biology* **26**: 119–164.
- Tenaillon, M. I., K. Seddiki, M. Mollion, M. L. Guilloux, E. Marchadier, *et al.*, 2018 Transcriptomic response to divergent selection for flowering times reveals convergence and key players of the underlying gene regulatory network. *bioRxiv* **7**: 461947.
- Turelli, M., 1984 Heritable genetic variation via mutation-selection balance: Lerch’s zeta meets the abdominal bristle. **63**

- 1 Theoretical Population Biology **25**: 138–193.
- 2 Walsh, B. and M. Lynch, 2018 *Evolution and Selection of Quantita-*  
3 *tive Traits*, volume 1. Oxford University Press.
- 4 Weber, K. E., 1990 Increased selection response in larger  
5 populations. I. Selection for wing-tip height in *Drosophila*  
6 *melanogaster* at three population sizes. *Genetics* **125**: 579–84.
- 7 Weber, K. E., 1996 Large genetic change at small fitness cost  
8 in large populations of *Drosophila melanogaster* selected for  
9 wind tunnel flight: rethinking fitness surfaces. *Genetics* **144**:  
10 205–13.
- 11 Weber, K. E. and L. T. Diggins, 1990 Increased selection response  
12 in larger populations. II. Selection for ethanol vapor resistance  
13 in *Drosophila melanogaster* at two population sizes. *Genetics*  
14 **125**: 585–597.
- 15 Wei, M., A. Caballero, and W. G. Hill, 1996 Selection response in  
16 finite populations. *Genetics* **144**: 1961–1974.
- 17 Wellenreuther, M. and B. Hansson, 2016 Detecting Polygenic  
18 Evolution: Problems, Pitfalls, and Promises. *Trends in Genet-*  
19 *ics* **32**: 155–164.
- 20 Zeng, Z. B. and C. C. Cockerham, 1993 Mutation models and  
21 quantitative genetic variation. *Genetics* **133**: 729–736.

1 **Supplementary material**

2 **Saclay DSE's selection scheme**

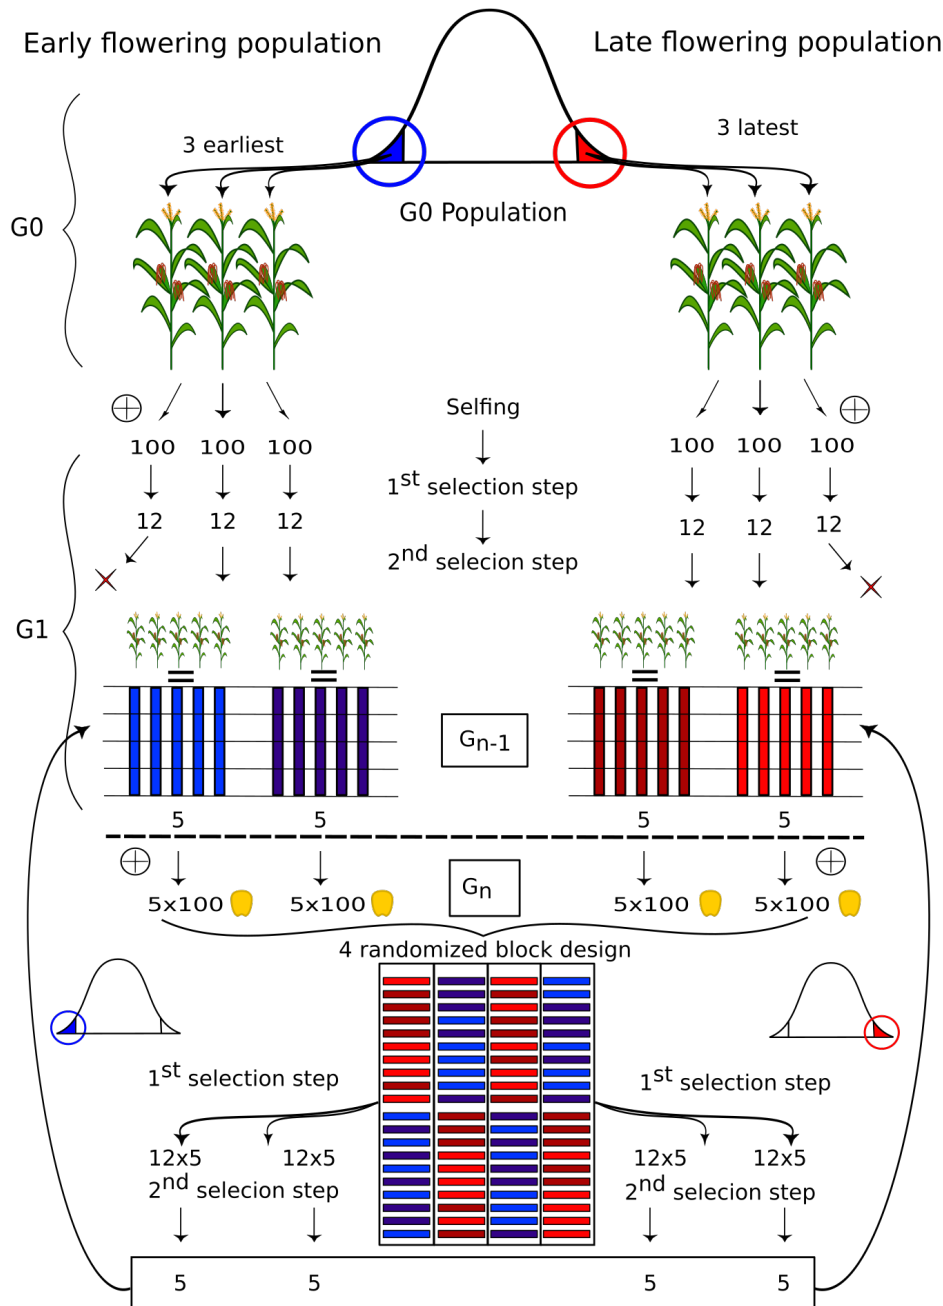

**Figure S1 Experimental scheme of Saclay DSEs.** For clarity a single scheme is shown but was replicated for the two DSEs. Starting from an inbred  $G_0$  population with little standing variation ( $< 1\%$  residual heterozygosity (Durand *et al.* 2015)), the three earliest (resp. latest) flowering individuals represented in blue (resp. red) were chosen based on their offspring phenotypic values as the founders of two families forming the early (resp. late) population. For the subsequent generations, 10 ( $\approx 5$  per family) extreme progenitors were selected in a two step selection scheme among 1000 plants. More specifically, 100 seeds per progenitor were evaluated in a four randomized-block design, *i.e.* 25 seeds per block in a single row. In a first selection step, the  $3 \times 4 = 12$  earliest (resp. latest) flowering plants among the 100 plants per progenitor were selected in a first step. Then in a second selection step, 10 ( $\approx 5$  per family) individuals were selected within each population based on both flowering time and kernel weight and the additional condition of preserving two progenitors per family from the previous generation.



**Saclay DSEs Pedigree relationship**

(a) ME1

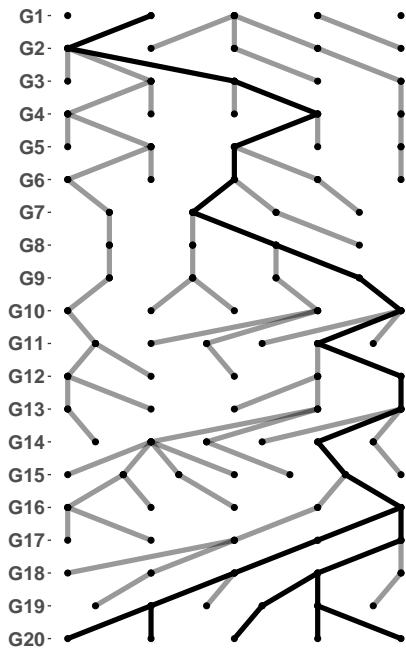

(b) ME2

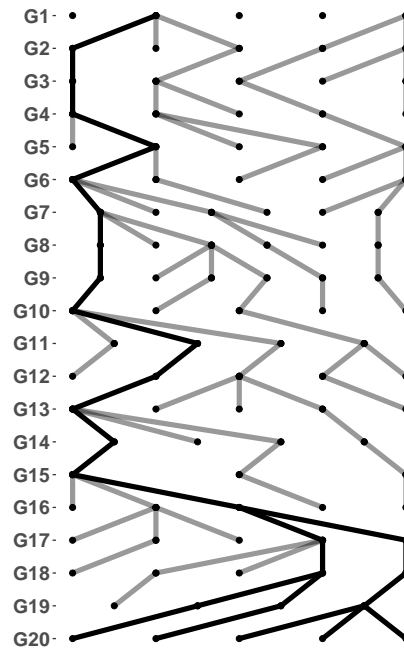

(c) ML1

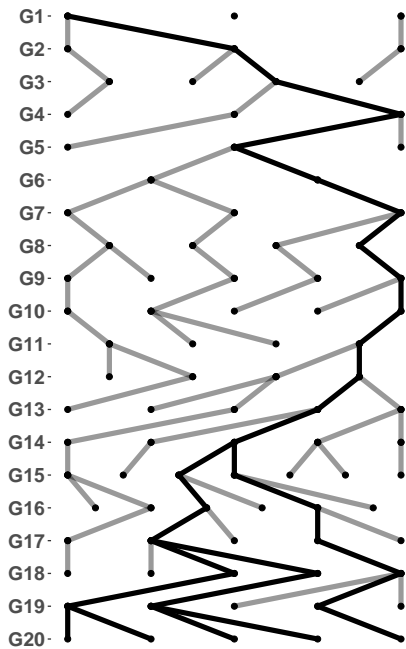

(d) ML2

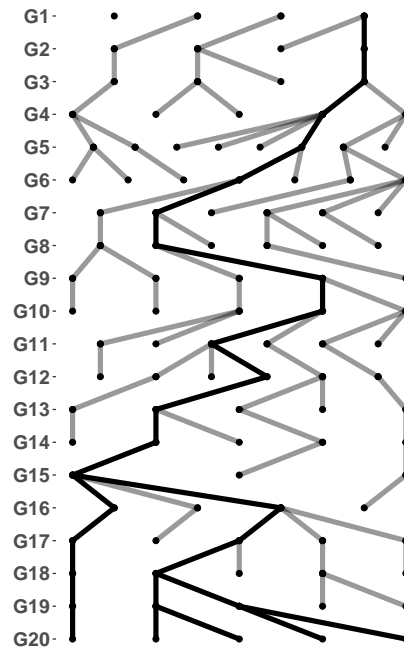

**Figure S2 MBS family pedigrees from G1 to G<sub>20</sub>.** The two early families ME1 (a) and ME2 (b), and the two late families ML1 (c) and ML2 (d) are presented. Each node corresponds to a progenitor selected at a given generation. Each edge corresponds to a filial relationship between a progenitor and its offspring. Thick black lines indicate the ancestral path of the last generation (G<sub>20</sub>).

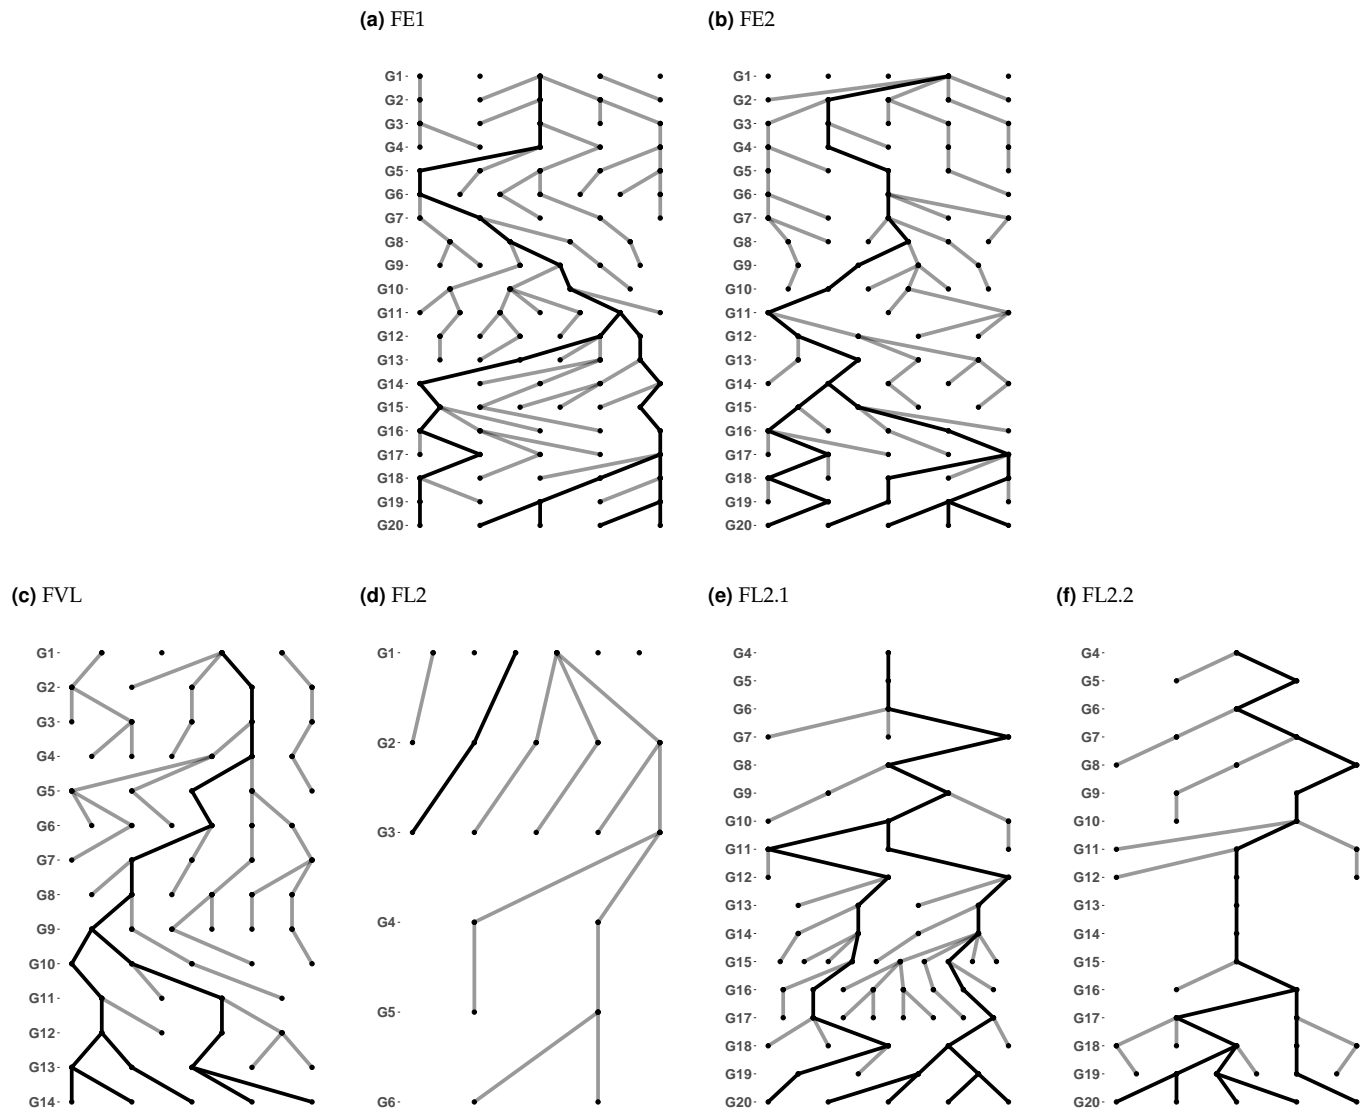

**Figure S2 (Continued)** F252 family pedigrees from G1 to G<sub>20</sub>. Two early families FE1 (a), FE2 (b) and two late families FVL (c) & FL2 (d), are represented. FVL (c) could not be maintained after G<sub>14</sub> as flowering occurred too late in the season for seed production. Both FL2.1 (e) and FL2.2 (f) were derived from a same individual from FL2 (d) at G<sub>3</sub>, after FVL was discarded. Each node corresponds to a progenitor selected at a given generation. Each edge corresponds to a filial relationship between a progenitor and its offspring. Thick black lines indicate the ancestral path of the last generation. (G<sub>20</sub>)

### Selection response and input - output variables relationship description

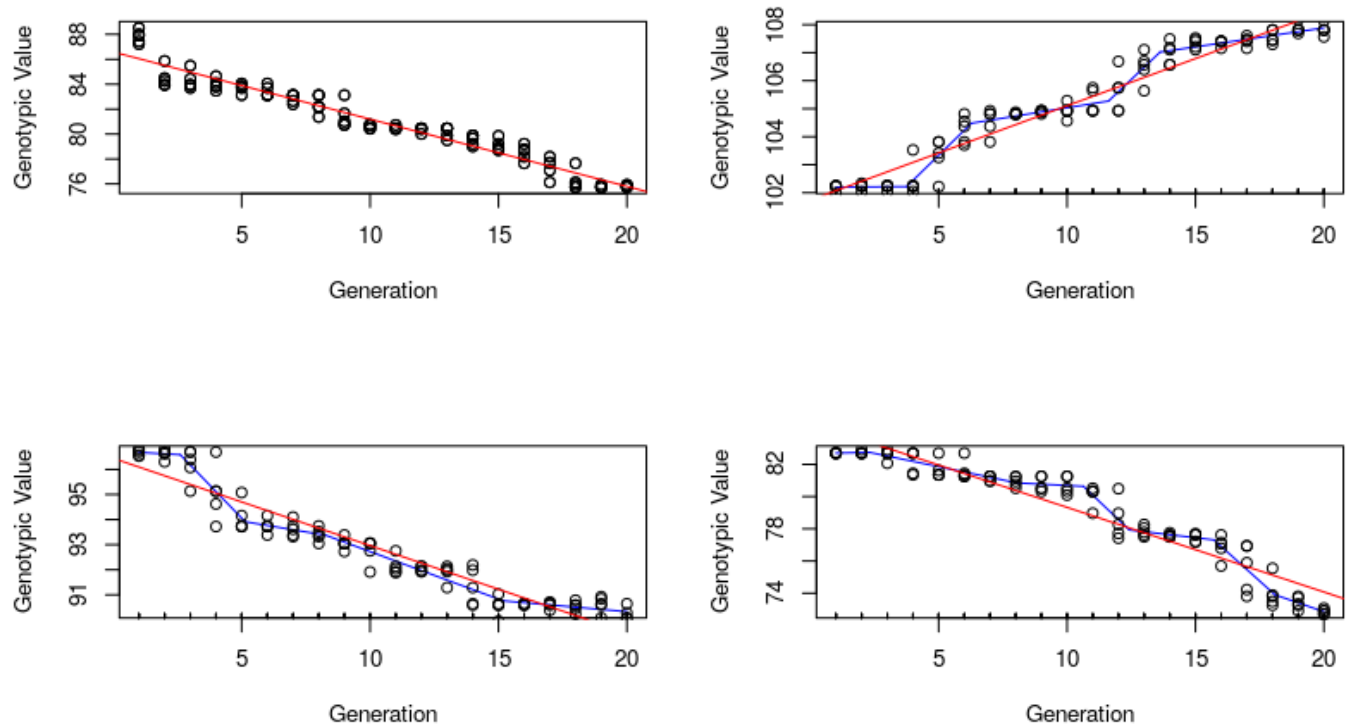

**Figure S3** Illustration of simulated non-linear selection response in MBS. Each panel presents the evolution through time (x axis) of the genotypic value (y axis) of the 5 selected individual per family (empty dots). The red lines shows the linear regression of the selected genotypic values through times, while blue lines correspond to the best (AIC criterion) segmented linear model. The top left panel is an example for which a simple linear model fitted best the selection response, while the three others show a diversity of non-linear behaviors.

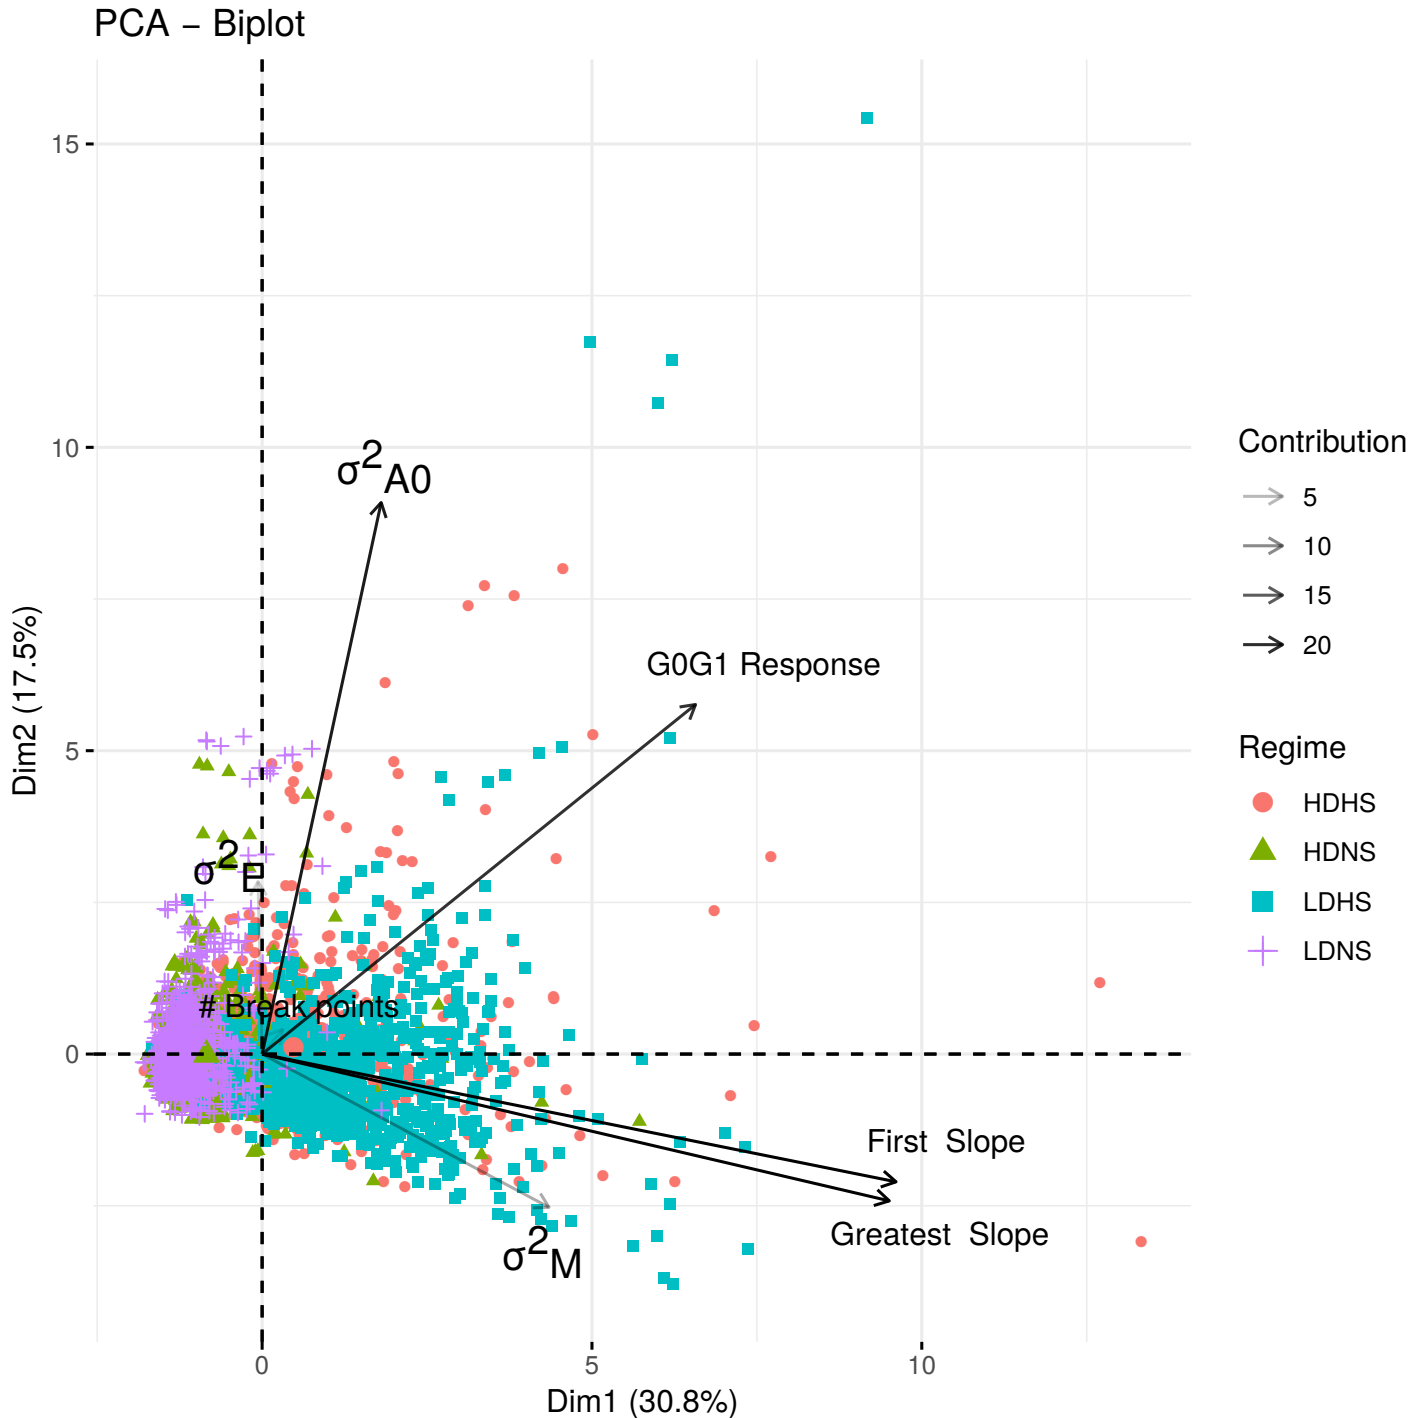

**Figure S4** Correlation between model input variables ( $\sigma^2_{A0}$ ,  $\sigma^2_M$  and  $\sigma^2_E$ ) and output variables ( $G_0G_{20}$  Response, # Breakpoints, First Slope and Greatest Slope). We obtained the output variables by fitting a segmented linear regression to the selection response from  $G_1$  to  $G_{20}$  in individual. We estimated the number of breakpoints, the corresponding slopes, as well as the first & greatest slope by AIC maximization. In addition we determined the  $G_0G_{20}$  response. A Principle Component analysis was carried out on a subset of 200 independent simulations per regime (HDHS, LDHS, HDNS, LDNS). The darker the arrow representing a variable, the higher the intensity of its correlation to the axes.



## Diversity dynamics

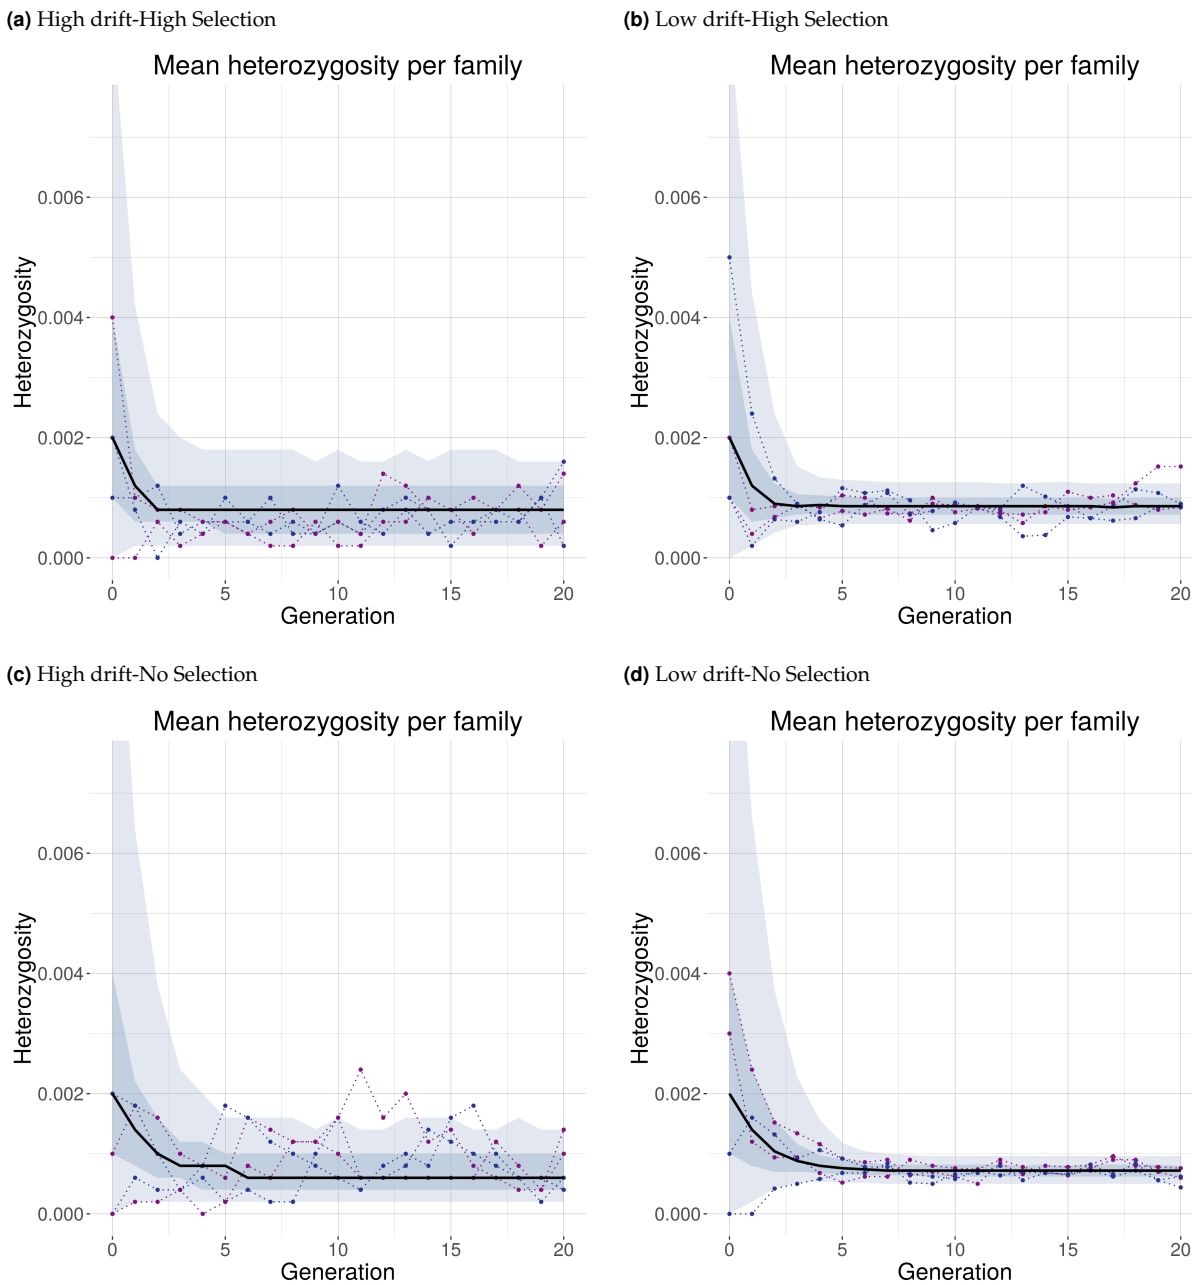

**Figure S5** Evolution through time of the per-family mean heterozygosity over all loci, under HDHS (a), LDHS (b), HDNS (c), LDNS (d). The black line represents the median value of the per-family mean heterozygosity. The shaded area corresponds to the 5<sup>th</sup>-95<sup>th</sup> percentile (light blue) and to the 25<sup>th</sup>-75<sup>th</sup> percentile (dark blue). Four randomly chosen simulated families are represented with dotted line.

(a) High drift-High Selection

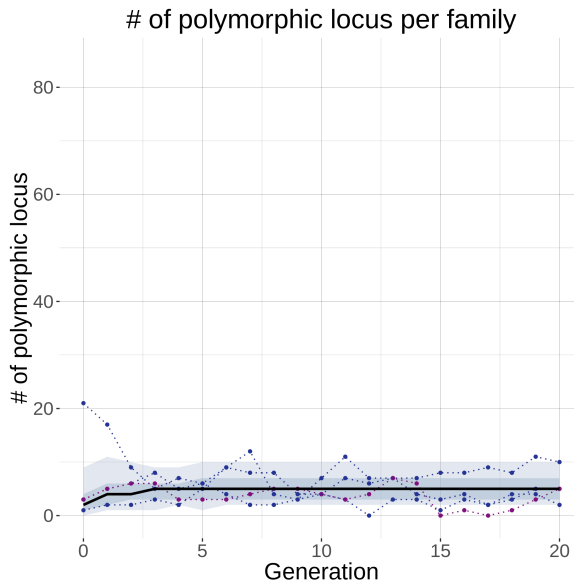

(b) Low drift-High Selection

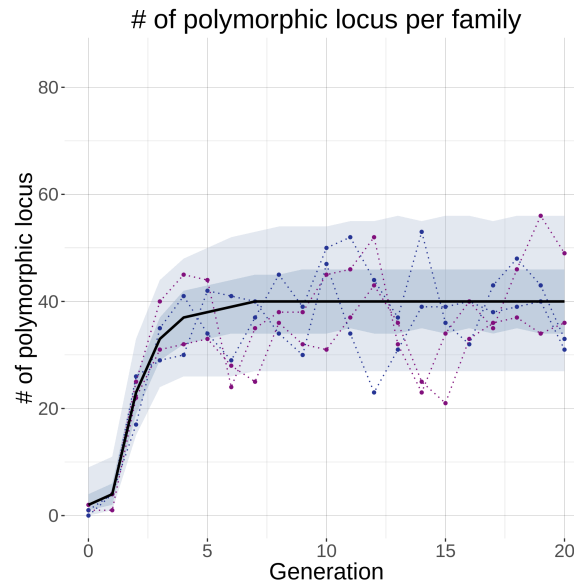

(c) High drift-No Selection

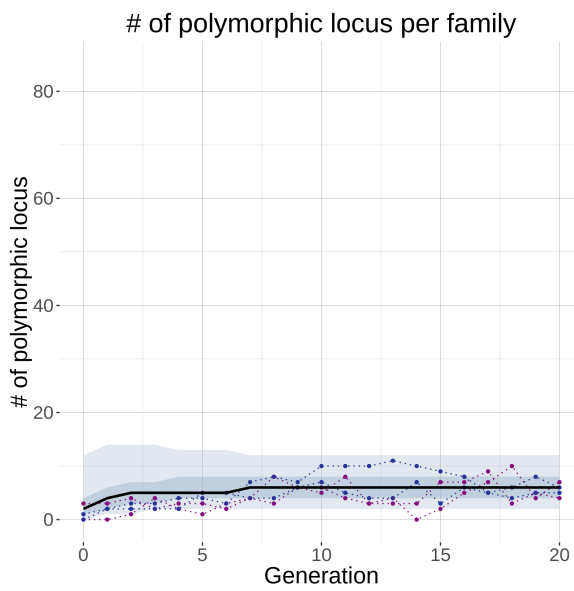

(d) Low drift-No Selection

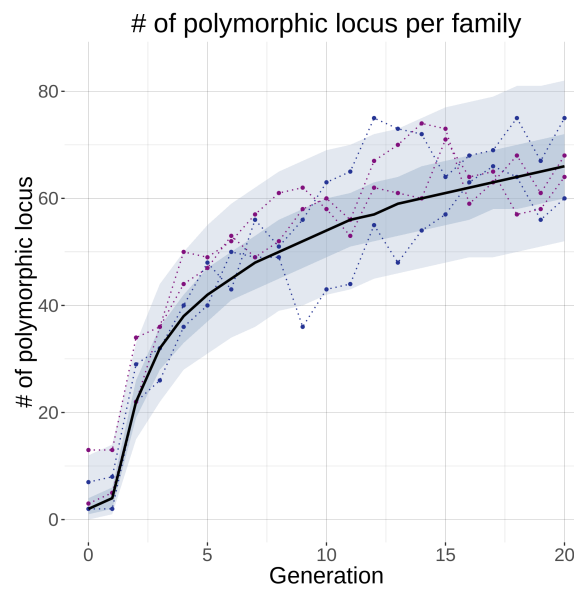

**Figure S6** Evolution through time of the per-family mean number of polymorphic loci, under HDHS (a), LDHS (b), HDNS (c), LDNS (d). The black line represents the median value over 2000 simulations. The shaded area corresponds to the 5<sup>th</sup>-95<sup>th</sup> percentile (light blue) and to the 25<sup>th</sup>-75<sup>th</sup> percentile (dark blue). Four randomly chosen simulated families are represented with dotted line.

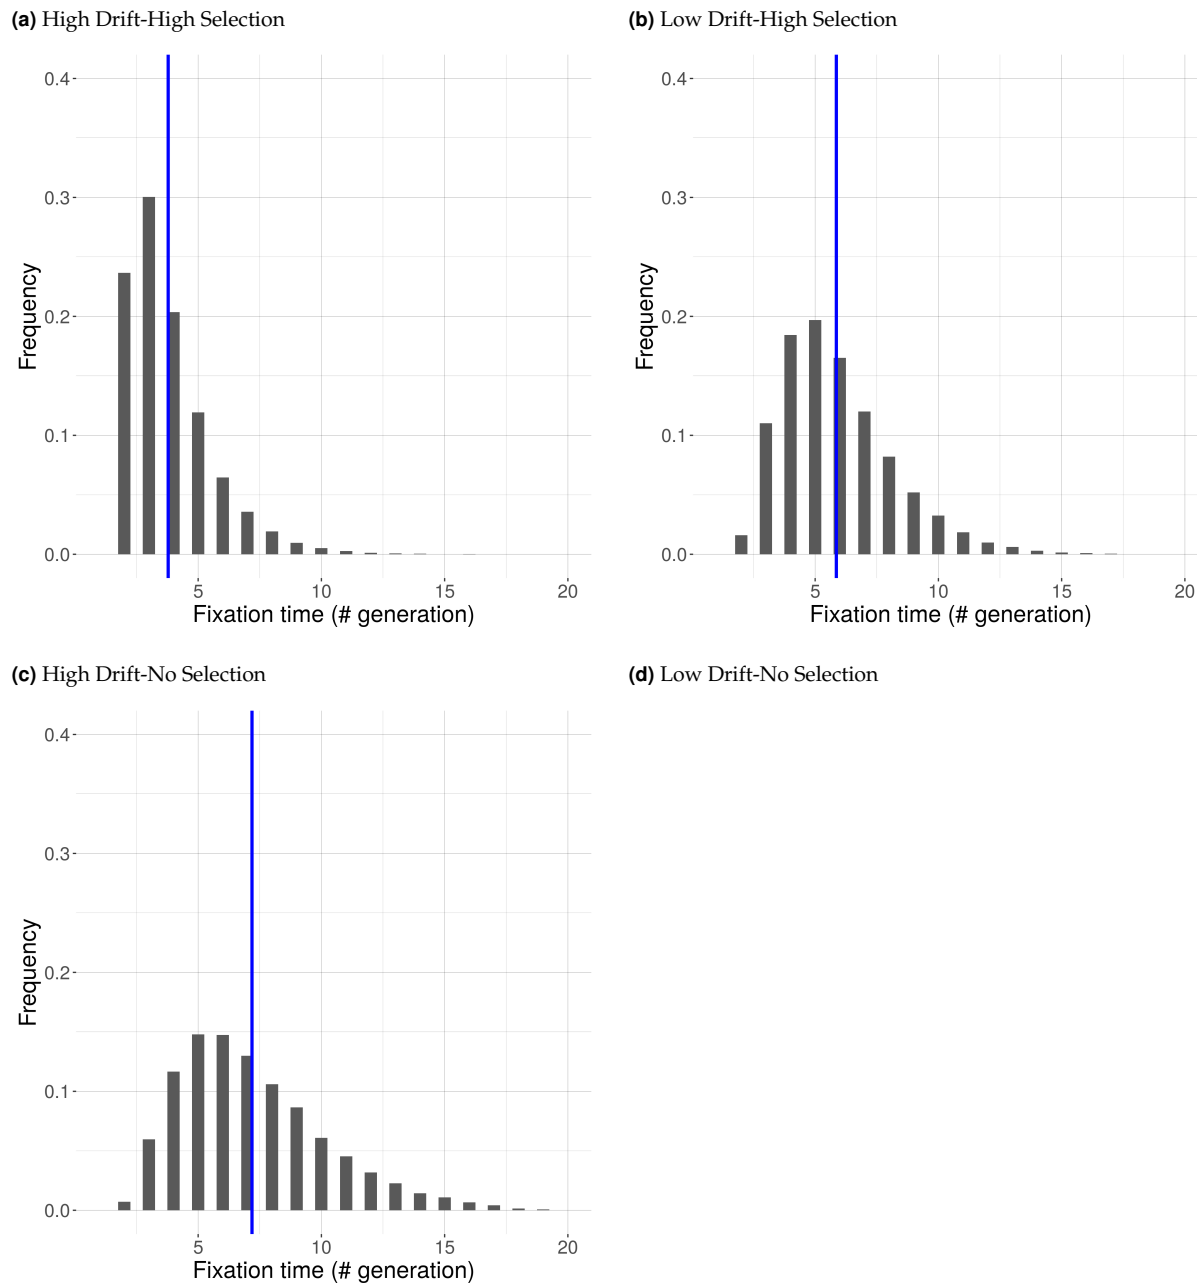

**Figure S7** Frequency distribution of mutation fixation times over all simulated families under HDHS (a), LDHS (b), HDNS (c), LDNS (d). Note that under LDNS, we obtained very few fixed mutation so that we were unable to draw the corresponding distribution. Blue vertical lines represent the interpolated median.

1 **Mutational effects and normalization**

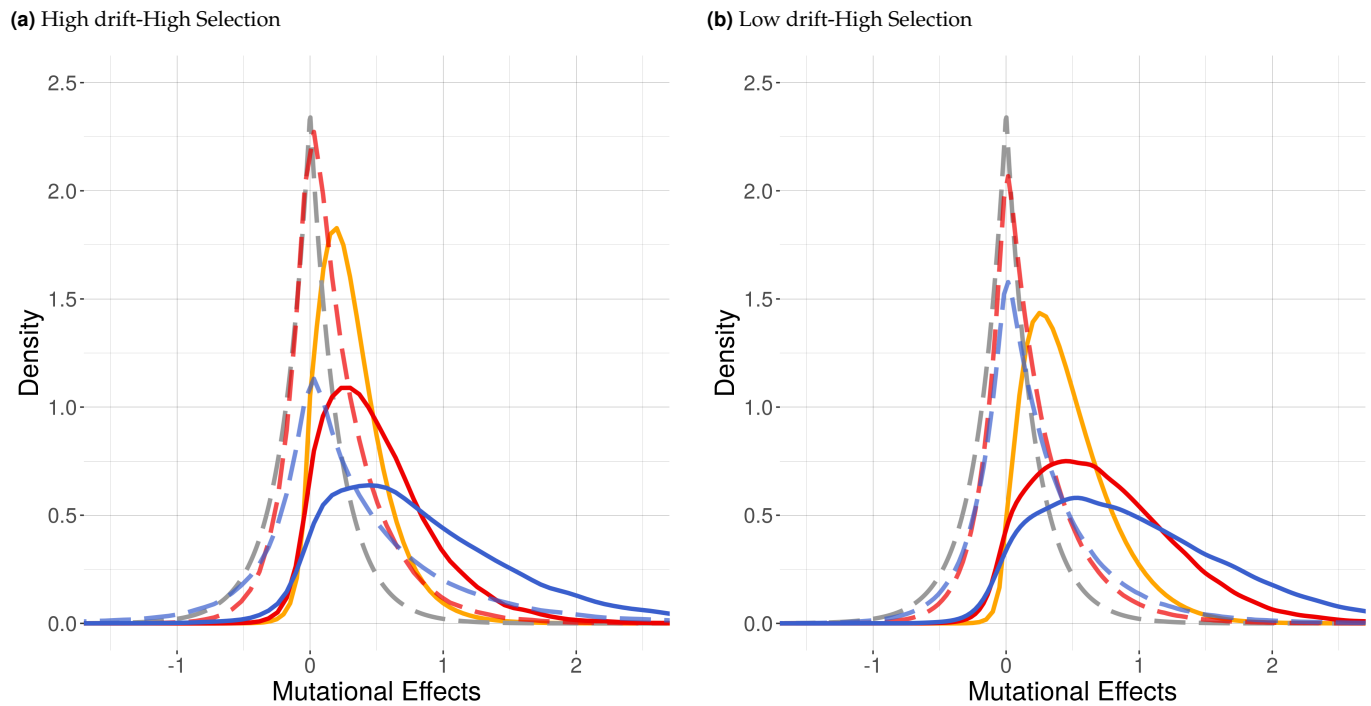

**Figure S8** Distribution of mutation effects under HDHS (a), LDHS (b). The dotted lines indicate the distribution of effects (DFE) of incoming mutations considering raw effects in all individuals (grey), in selected individuals (red), and effects normalized by environmental variation in selected individuals (blue). The plain lines indicate DFE of fixed mutations following the same colour code. The golden line represents the expected DFE of fixed mutations according to Eq: 16.



### Evolution of Cov(GE) though time

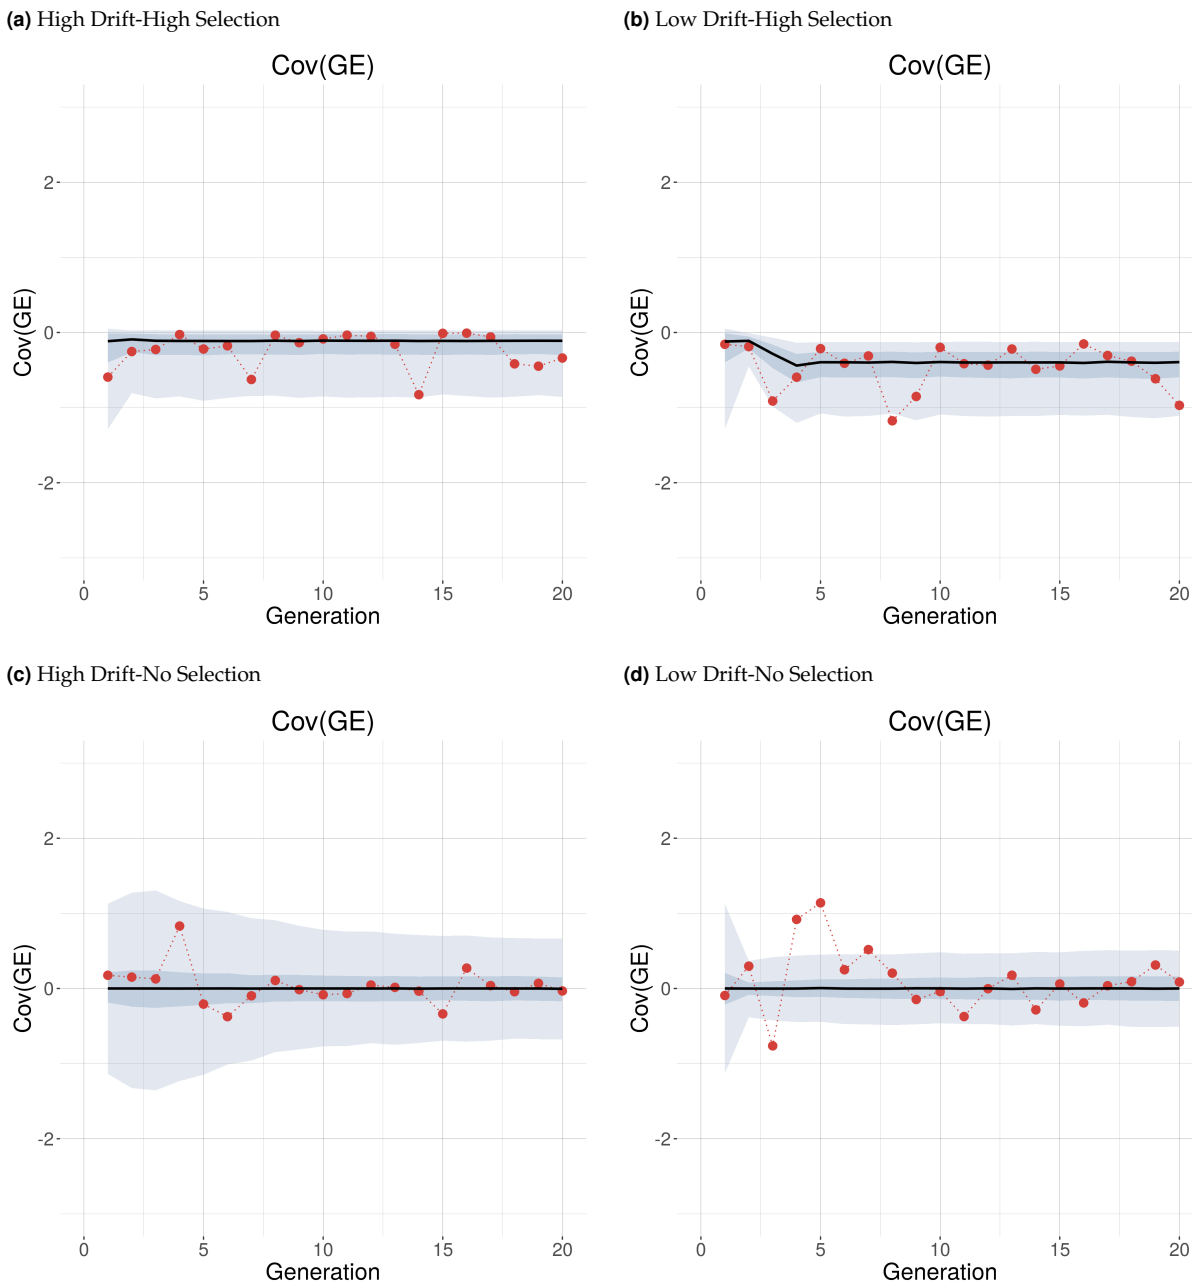

**Figure S9** Evolution through time of the per-family covariance between environmental and genotypic values of the selected individuals, under our four simulated regimes. The black line represents the evolution of the median value over 2000 simulations in HDHS (a), LDHS (b), HDNS (c), LDNS (d). The shaded area corresponds to the 5<sup>th</sup>-95<sup>th</sup> percentile (light blue) and to the 25<sup>th</sup>-75<sup>th</sup> percentile (dark blue). One randomly chosen simulated family is represented with red dotted line, to highlight the inter-generation stochasticity. No significant autocorrelation was found.

1 **Negative**  $\text{Cov}(G_{|selected}, E_{|selected})$  **schematic**

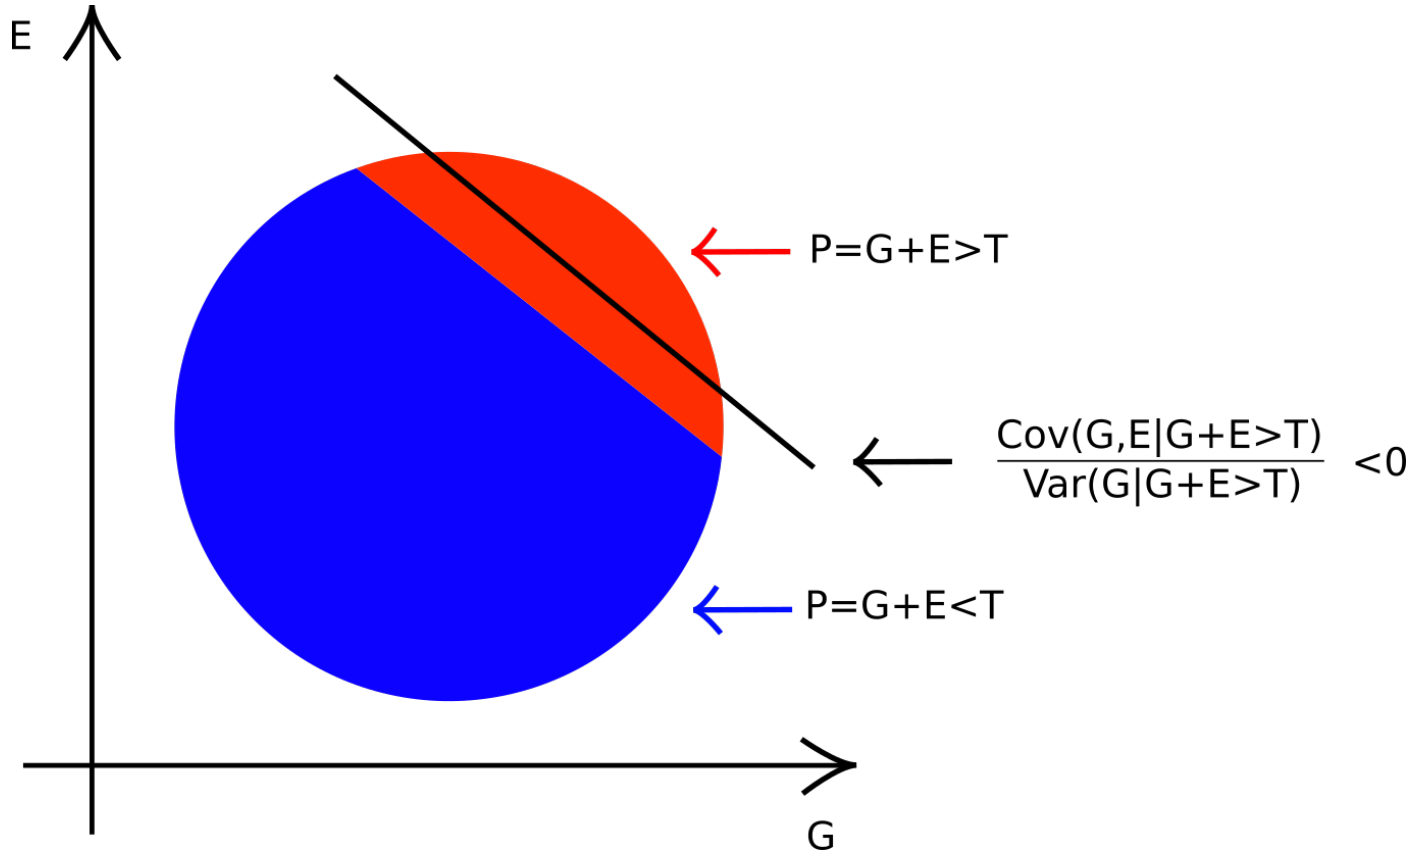

**Figure S10 Schematic representation of the impact of selection on  $\text{Cov}(G, E)$ .** For illustration purposes, let  $P$  the sum of two independent and identically distributed random variables,  $G$  and  $E$ , such that both  $G$  and  $E$  follow a standard normal distribution, *i.e.*  $P = G + E$  with  $G \sim \mathcal{N}(0, 1)$  and  $E \sim \mathcal{N}(0, 1)$ . The black line represent the regression of  $E_{|selected}$  on  $G_{|selected}$  with a negative slope  $\frac{\text{Cov}(G_{|selected}, E_{|selected})}{\text{Var}(G_{|selected})} \leq 0$ .

**Negative  $\text{Cov}(G_{|\text{selected}}, E_{|\text{selected}})$  and its stochasticity**

1

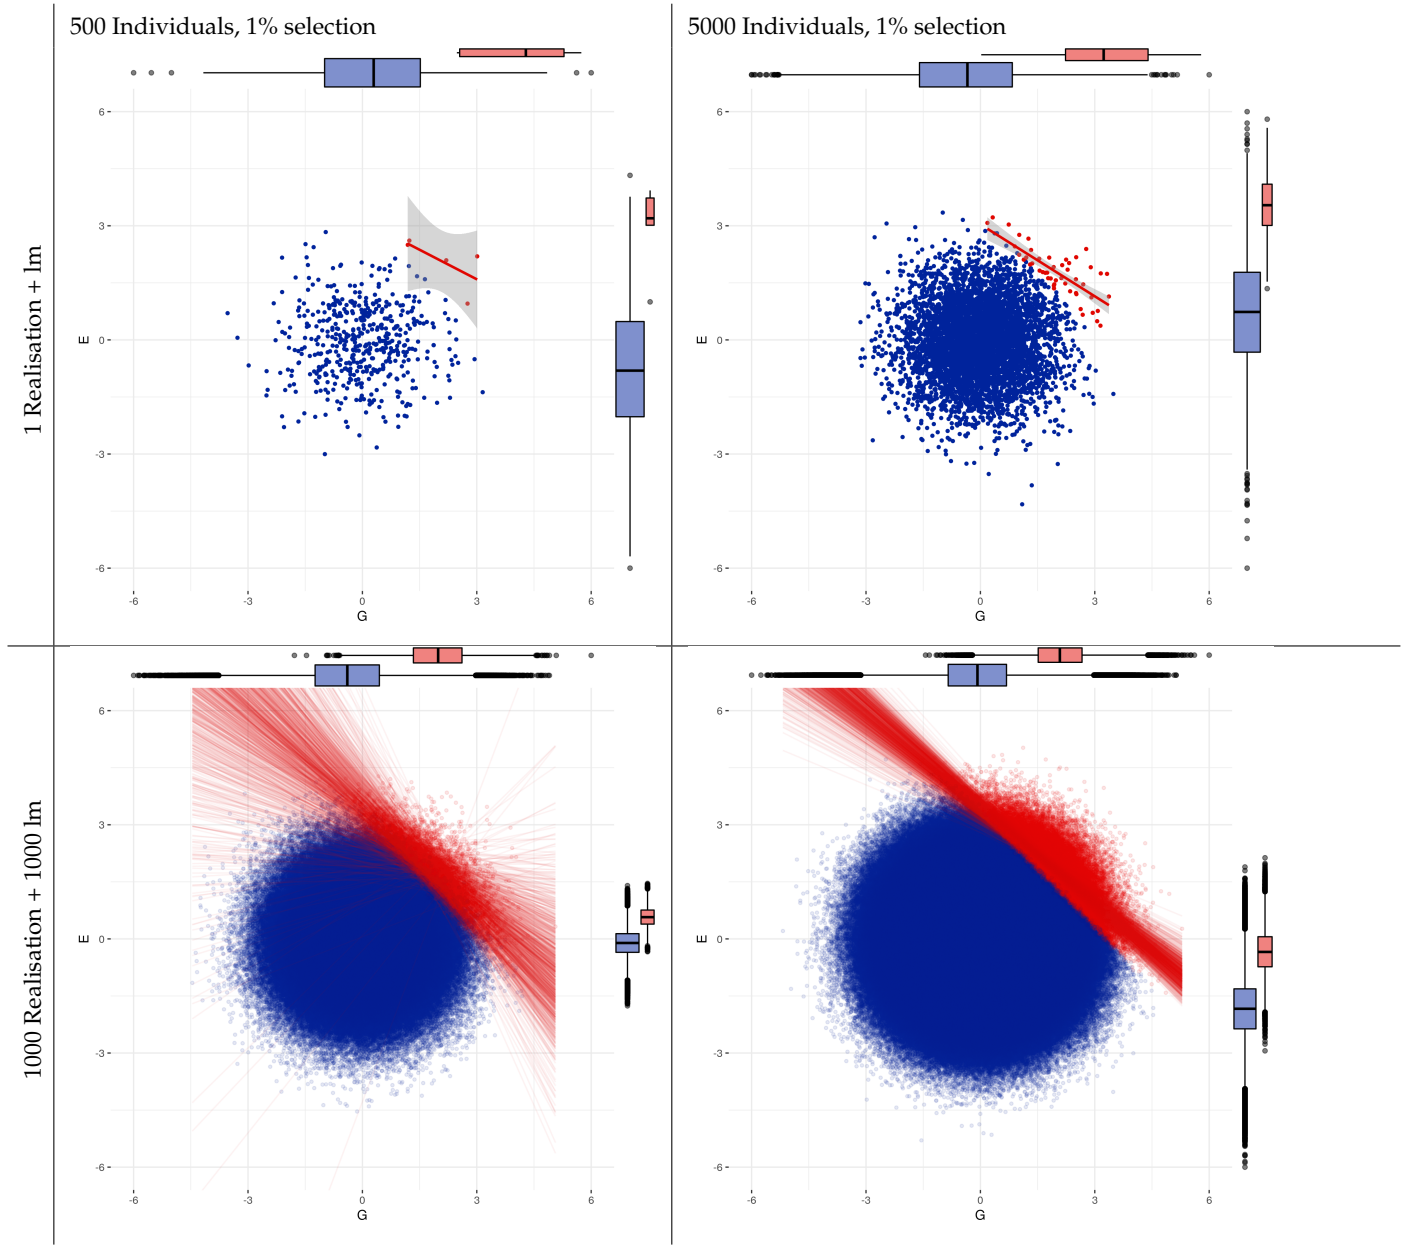

**Figure S11 Schematic representation of the impact of selection and drift on  $\text{Cov}(G, E)$ .** Let  $P$  the sum of two independent random variables,  $G$  and  $E$ , such that both  $G$  and  $E$  follow a standard normal distribution, *i.e.*  $P = G + E$  with  $G \sim \mathcal{N}(0,1)$  and  $E \sim \mathcal{N}(0,1)$ . Let sample 500 individuals from  $P$  and plot  $E = f(G)$  (right columns), resp. 5000 (left columns) and select (red dots) the best 1% based on  $P$ . The upper row represents one realisation, with the red line corresponding to the regression of  $E_{|\text{selected}}$  on  $G_{|\text{selected}}$  with a negative slope  $\frac{\text{Cov}(G_{|\text{selected}}, E_{|\text{selected}})}{\text{Var}(G_{|\text{selected}})} \leq 0$ . The lower row represents the realisation of 1000 independent sampling of 500 and 5000 individuals, with the corresponding linear regressions. We observe a lower lesser exploration of possible values (red plus blue area) under low population size and a high stochasticity in the values of  $\text{Cov}(G_{|\text{selected}}, E_{|\text{selected}})$
